# Supplementary material for: Relationships between Gene Expression and Brain Wiring in the Adult Rodent Brain
Source: PLoS Comput Biol. 2011 Jan 6;7(1):e1001049. doi: 10.1371/journal.pcbi.1001049 (PMC3017102; doi:10.1371/journal.pcbi.1001049)
Supplement: Table S1 — Brain region statistics (appended connectivity). (0.53 MB XLS) [file pcbi.1001049.s009.xls]

## Sheet: Sheet0
Name	Virtual region	MotorRegion	Sum of Expression values	Volume in voxels	connections	connectionCount	Count of NaN expression values	Mapped ABA names	x coordinate (anterior to posterior)	y coordinate (dorsal to ventral)	z coordinate (lateral to medial)
Dorsal premammillary nucleus	FALSE	FALSE	-33976.3	40	|Ammon Horn(incoming)|Anterior cingulate area(incoming)|Anterior cingulate area dorsal part(incoming)|Anterior hypothalamic area(incoming)|Anterior hypothalamic central part(incoming)|Anterior hypothalamic dorsal part(incoming)|Anterior hypothalamic nucleus(incoming)|Anterior hypothalamic nucleus anterior part(incoming)|Anterior hypothalamic posterior part(incoming)|Basal Nuclei(incoming)|Basolat…	172	837	[Dorsal premammillary nucleus]	75.675	61.6	53.975
Parastrial nucleus	FALSE	FALSE	-32441.5	13	|Anteroventral periventricular nucleus(incoming)|Anteroventral preoptic nucleus(incoming)|Basal Nuclei(incoming)|Bed nuclei of the stria terminalis(incoming)|Bed nuclei of the stria terminalis anterior division(incoming)|Bed nuclei of the stria terminalis anterior division dorsomedial nucleus(incoming)|Bed nuclei of the stria terminalis anterior division fusiform nucleus(incoming)|Bed nuclei of t…	152	2016	[Parastrial nucleus]	51.1538	56.8462	52
Piriform area	FALSE	FALSE	-1301.39	5282	|Agranular insular area(incoming)|Agranular insular area posterior part(incoming)|Basal Nuclei(incoming)|Basomedial nucleus of the amygdala(incoming)|Basomedial nucleus of the amygdala posterior part(incoming)|Bed nuclei of the stria terminalis(incoming)|Bed nuclei of the stria terminalis anterior division(incoming)|Bed nuclei of the stria terminalis anterolateral area(incoming)|Bed nuclei of the…	94	10	[Piriform area]	54.8624	60.1861	27.8215
Subiculum	FALSE	FALSE	-7308.62	2031	|Ammon Horn(incoming)|Anterior amygdaloid area(incoming)|Anterior cingulate area(incoming)|Anterior group of the dorsal thalamus(incoming)|Anterior hypothalamic area(incoming)|Anterior hypothalamic central part(incoming)|Anterior hypothalamic nucleus(incoming)|Anterior hypothalamic posterior part(incoming)|Anteromedial nucleus of thalamus(incoming)|Anteroventral nucleus of thalamus(incoming)|Ante…	250	3	[Subiculum]	88.7297	42.2196	30.9877
Nucleus raphe pontis	FALSE	FALSE	-29764.9	27	|Brain(incoming)|Brainstem(incoming)|Central gray of the brain(incoming)|Cerebellar cortex(incoming)|Cerebellum(incoming)|Cerebral cortex(incoming)|Cerebral cortex, layers1-6a [cortical plate](incoming)|Cerebrum(incoming)|Flocculus(incoming)|Hemispheric regions(incoming)|Hypothalamus(incoming)|Interbrain(incoming)|Lateral hypothalamic area(incoming)|Lateral zone of the hypothalamus(incoming)|Medi…	31	6818	[Nucleus raphé pontis]	104.074	50.1481	58.7778
Central medial nucleus of the thalamus	FALSE	FALSE	-35511.2	170	|Anterior cingulate area(incoming)|Anterior hypothalamic area(incoming)|Anterior hypothalamic central part(incoming)|Anterior hypothalamic nucleus(incoming)|Auditory areas(incoming)|Basal Nuclei(incoming)|Basomedial nucleus of the amygdala(incoming)|Basomedial nucleus of the amygdala anterior part(incoming)|Bed nuclei of the stria terminalis(incoming)|Bed nuclei of the stria terminalis anterior d…	92	959	[Central medial nucleus of the thalamus]	67.0765	46.2647	55.6882
Ventral posterior complex of the thalamus	FALSE	FALSE	-21101.6	965	|Anterior cingulate area(incoming)|Anterior cingulate area dorsal part(incoming)|Basal Nuclei(incoming)|Brain(incoming)|Brainstem(incoming)|Cerebral cortex(incoming)|Cerebral cortex, layers1-6a [cortical plate](incoming)|Cerebrum(incoming)|Dorsal Thalamus(incoming)|Entorhinal area(incoming)|Hippocampal formation(incoming)|Interbrain(incoming)|Lateral group of the dorsal thalamus(incoming)|Lateral…	65	15	[Ventral posterior complex of the thalamus]	71.0497	44.3627	41.6953
Pallidum dorsal region	FALSE	FALSE	-25436.1	874	|Agranular insular area(incoming)|Agranular insular area dorsal part(incoming)|Agranular insular area posterior part(incoming)|Anterior cingulate area(incoming)|Basal Nuclei(incoming)|Bed nuclei of the stria terminalis(incoming)|Bed nuclei of the stria terminalis anterior division(incoming)|Bed nuclei of the stria terminalis anterior division fusiform nucleus(incoming)|Bed nuclei of the stria ter…	50	29	[Pallidum_ dorsal region]	61.651	49.4382	36.7437
Motor nucleus of the trigeminal	FALSE	TRUE	-12929.6	191	|Brain(incoming)|Midbrain-Hindbrain(incoming)|Midbrain-Hindbrain, Sensory(incoming)|Midbrain-Hindbrain, Sensory, Gustatory-Visceral(incoming)|Nucleus of the solitary tract(incoming)|Pontine reticular nucleus(incoming)|Pontine reticular nucleus caudal part(incoming)|Reticular core(incoming)|Reticular formation(incoming)	9	193	[Motor nucleus of trigeminal]	104.366	52.7016	46.0262
Nucleus raphe obscurus	FALSE	FALSE	-25138	32	|Basal Nuclei(incoming)|Bed nuclei of the stria terminalis(incoming)|Bed nuclei of the stria terminalis anterior division(incoming)|Bed nuclei of the stria terminalis anterior division dorsomedial nucleus(incoming)|Bed nuclei of the stria terminalis anterior division magnocellular nucleus(incoming)|Brain(incoming)|Brainstem(incoming)|Central gray of the brain(incoming)|Cerebral cortex(incoming)|C…	26	5140	[Nucleus raphé obscurus]	121.469	65.9062	58.0625
Anterodorsal nucleus of the thalamus	FALSE	FALSE	-7317.06	90	|Ammon Horn(incoming)|Anterior cingulate area(incoming)|Anterior cingulate area dorsal part(incoming)|Anterior cingulate area ventral part(incoming)|Basal Nuclei(incoming)|Bed nuclei of the stria terminalis(incoming)|Bed nuclei of the stria terminalis anterior division(incoming)|Bed nuclei of the stria terminalis anterior division dorsomedial nucleus(incoming)|Bed nuclei of the stria terminalis p…	79	90	[Anterodorsal nucleus]	60.4333	37.6333	49.7556
Nucleus of the posterior commissure	FALSE	FALSE	-28149.4	134	|Anterior group of the dorsal thalamus(incoming)|Anterior hypothalamic area(incoming)|Anterior hypothalamic central part(incoming)|Anterior hypothalamic nucleus(incoming)|Anterior hypothalamic nucleus anterior part(incoming)|Anterior hypothalamic posterior part(incoming)|Anterior pretectal nucleus(incoming)|Brain(incoming)|Brainstem(incoming)|Central gray of the brain(incoming)|Cerebral cortex(in…	46	98	[Nucleus of the posterior commissure]	79.1343	37.1418	51.4104
Retrorubral area	FALSE	FALSE	-21466	216	|Anterior pretectal nucleus(incoming)|Basal Nuclei(incoming)|Bed nuclei of the stria terminalis(incoming)|Bed nuclei of the stria terminalis anterior division(incoming)|Bed nuclei of the stria terminalis anterior division dorsomedial nucleus(incoming)|Bed nuclei of the stria terminalis anterior division fusiform nucleus(incoming)|Bed nuclei of the stria terminalis anterior division magnocellular …	82	30	[Midbrain reticular nucleus_ retrorubral area]	91.713	48.1204	45.0694
Medial pretectal area	FALSE	FALSE	-19167.2	44	|Anterior group of the dorsal thalamus(incoming)|Anterior hypothalamic area(incoming)|Anterior hypothalamic nucleus(incoming)|Anterior hypothalamic posterior part(incoming)|Brain(incoming)|Brainstem(incoming)|Central gray of the brain(incoming)|Cerebral cortex(incoming)|Cerebral cortex, layers1-6a [cortical plate](incoming)|Cerebrum(incoming)|Dorsal Thalamus(incoming)|Hypothalamus(incoming)|Infer…	39	320	[Medial pretectal area]	79.0682	32.0682	54.0227
Sublaterodorsal nucleus	FALSE	FALSE	-23749.5	40	|Anterior pretectal nucleus(incoming)|Basal Nuclei(incoming)|Bed nuclei of the stria terminalis(incoming)|Bed nuclei of the stria terminalis anterior division(incoming)|Bed nuclei of the stria terminalis anterior division dorsomedial nucleus(incoming)|Brain(incoming)|Brainstem(incoming)|Central gray of the brain(incoming)|Cerebrum(incoming)|Hypothalamus(incoming)|Interbrain(incoming)|Medial preop…	30	596	[Sublaterodorsal nucleus]	104.575	43.425	51.6
Paragigantocellular reticular nucleus	FALSE	FALSE	-10243.2	376	|Area postrema(incoming)|Basal Nuclei(incoming)|Bed nuclei of the stria terminalis(incoming)|Bed nuclei of the stria terminalis anterior division(incoming)|Bed nuclei of the stria terminalis anterior division dorsomedial nucleus(incoming)|Bed nuclei of the stria terminalis rhomboid nucleus(incoming)|Brain(incoming)|Brainstem(incoming)|Central gray of the brain(incoming)|Cerebrum(incoming)|Hypotha…	71	68	[Paragigantocellular reticular nucleus]	117.152	66.8059	47.1995
Intergeniculate leaflet of the lateral geniculate complex	FALSE	FALSE	-17016.7	47	|Anterior hypothalamic area(incoming)|Brain(incoming)|Brainstem(incoming)|Central gray of the brain(incoming)|Geniculate group of the ventral thalamus(incoming)|Hypothalamus(incoming)|Interbrain(incoming)|Intergeniculate leaflet of the lateral geniculate complex(incoming)|Medial zone of the hypothalamus(incoming)|Midbrain-Hindbrain(incoming)|Midbrain-Hindbrain, Sensory(incoming)|Midbrain-Hindbrai…	54	114	[Intergeniculate leaflet of the lateral geniculate complex]	78.2766	40.3404	34.4894
Anterior pretectal nucleus	FALSE	FALSE	-24265.2	332	|Anterior group of the dorsal thalamus(incoming)|Anterolateral visual area(incoming)|Brain(incoming)|Brainstem(incoming)|Central gray of the brain(incoming)|Central lateral nucleus of the thalamus(incoming)|Cerebral cortex(incoming)|Cerebral cortex, layers1-6a [cortical plate](incoming)|Cerebrum(incoming)|Dorsal Thalamus(incoming)|Dorsal part of the lateral geniculate complex(incoming)|Dorsal teg…	134	30	[Anterior pretectal nucleus]	80.1657	36.4367	45.9789
Cuneiform nucleus	FALSE	FALSE	-23568.5	151	|Anterior hypothalamic area(incoming)|Anterior hypothalamic central part(incoming)|Anterior hypothalamic nucleus(incoming)|Anterior hypothalamic posterior part(incoming)|Basal Nuclei(incoming)|Bed nuclei of the stria terminalis(incoming)|Bed nuclei of the stria terminalis anterior division(incoming)|Bed nuclei of the stria terminalis anterior division dorsomedial nucleus(incoming)|Brain(incoming)…	67	117	[Cuneiform nucleus]	101.603	37.2384	45.9404
Medial vestibular nucleus	FALSE	TRUE	-6482.18	432	|Anterior pretectal nucleus(incoming)|Brain(incoming)|Cerebellar cortex(incoming)|Cerebellum(incoming)|Flocculus(incoming)|Hemispheric regions(incoming)|Midbrain-Hindbrain(incoming)|Midbrain-Hindbrain, Sensory(incoming)|Midbrain-Hindbrain, Sensory, Visual(incoming)|Pretectal region(incoming)|Brain(outgoing)|Central gray of the brain(outgoing)|Dorsal tegmental nucleus(outgoing)|Medial terminal nuc…	18	65	[Medial vestibular nucleus]	113.898	46.7616	50.3981
Postpiriform transition area	FALSE	FALSE	-7758.79	431	|Basal Nuclei(incoming)|Basolateral nucleus of the amygdala(incoming)|Basolateral nucleus of the amygdala posterior part(incoming)|Basomedial nucleus of the amygdala(incoming)|Basomedial nucleus of the amygdala anterior part(incoming)|Basomedial nucleus of the amygdala posterior part(incoming)|Bed nuclei of the stria terminalis(incoming)|Bed nuclei of the stria terminalis anterior division(incomi…	96	1264	[Postpiriform transition area]	83.2019	64.1972	23.8422
External cuneate nucleus	FALSE	FALSE	-4364.52	142	|Brain(incoming)|Midbrain-Hindbrain(incoming)|Midbrain-Hindbrain, Sensory(incoming)|Midbrain-Hindbrain, Sensory, Visual(incoming)|Superior colliculus(incoming)	5	82	[External cuneate nucleus]	124.387	47.3169	45.2042
Arcuate nucleus of the hypothalamus	FALSE	FALSE	-12874.3	162	|Anterior group of the dorsal thalamus(incoming)|Anterior hypothalamic area(incoming)|Anterodorsal nucleus of the thalamus(incoming)|Anterodorsal preoptic nucleus(incoming)|Anteroventral periventricular nucleus(incoming)|Anteroventral preoptic nucleus(incoming)|Basal Nuclei(incoming)|Bed nuclei of the stria terminalis(incoming)|Bed nuclei of the stria terminalis anterior division(incoming)|Bed nu…	92	2014	[Arcuate hypothalamic nucleus]	69.0864	69.9691	56.679
Inferior salivatory nucleus	FALSE	FALSE	-20511.3	32	|Basal Nuclei(incoming)|Bed nuclei of the stria terminalis(incoming)|Bed nuclei of the stria terminalis anterior division(incoming)|Bed nuclei of the stria terminalis rhomboid nucleus(incoming)|Brain(incoming)|Cerebrum(incoming)|Pallidum(incoming)|Pallidum rostral region(incoming)	8	446	[Inferior salivatory nucleus]	109.688	55.2812	45
Superior olivary complex	FALSE	FALSE	-19506	435	|Brain(incoming)|Midbrain-Hindbrain(incoming)|Midbrain-Hindbrain, Sensory(incoming)|Midbrain-Hindbrain, Sensory, Visual(incoming)|Superior colliculus(incoming)	5	24	[Superior olivary complex]	100.464	66.177	48.6667
Ventral premammillary nucleus	FALSE	FALSE	-24233.5	42	|Ammon Horn(incoming)|Anterior cingulate area(incoming)|Anterior cingulate area dorsal part(incoming)|Anterior hypothalamic area(incoming)|Anterodorsal preoptic nucleus(incoming)|Anteroventral preoptic nucleus(incoming)|Basal Nuclei(incoming)|Bed nuclei of the stria terminalis(incoming)|Bed nuclei of the stria terminalis anterior division(incoming)|Bed nuclei of the stria terminalis anterior divi…	193	676	[Ventral premammillary nucleus]	74.9286	64.9762	53.5476
Medial preoptic nucleus	FALSE	FALSE	-32023.4	98	|Agranular insular area(incoming)|Agranular insular area ventral part(incoming)|Anterior hypothalamic area(incoming)|Anterior hypothalamic central part(incoming)|Anterior hypothalamic nucleus(incoming)|Anterior hypothalamic nucleus anterior part(incoming)|Anterior hypothalamic posterior part(incoming)|Anterior periventricular nucleus of the hypothalamus(incoming)|Anterodorsal preoptic nucleus(inc…	304	2794	[Medial preoptic nucleus]	54.7551	63.4286	55.102
Suprachiasmatic nucleus	FALSE	FALSE	-24846.3	49	|Anterior hypothalamic area(incoming)|Anterior pretectal nucleus(incoming)|Anterodorsal preoptic nucleus(incoming)|Anteroventral periventricular nucleus(incoming)|Arcuate nucleus of the hypothalamus(incoming)|Basal Nuclei(incoming)|Bed nuclei of the stria terminalis(incoming)|Bed nuclei of the stria terminalis anterior division(incoming)|Bed nuclei of the stria terminalis anterior division dorsom…	121	7183	[Suprachiasmatic nucleus]	58.4286	67.6735	56.5714
Nucleus of the lateral lemniscus	FALSE	FALSE	-15661.9	452	|Basal Nuclei(incoming)|Bed nuclei of the stria terminalis(incoming)|Bed nuclei of the stria terminalis anterior division(incoming)|Bed nuclei of the stria terminalis anterolateral area(incoming)|Brain(incoming)|Central gray of the brain(incoming)|Cerebrum(incoming)|Cochlear nuclei(incoming)|Midbrain-Hindbrain(incoming)|Midbrain-Hindbrain, Sensory(incoming)|Midbrain-Hindbrain, Sensory, Auditory(i…	21	27	[Nucleus of the lateral lemniscus]	97.4447	48.5619	41.3119
Pallidum_ medial region	TRUE	FALSE	-17757.7		|Agranular insular area(incoming)|Agranular insular area dorsal part(incoming)|Ammon Horn(incoming)|Anterior cingulate area(incoming)|Anterior hypothalamic area(incoming)|Anterodorsal preoptic nucleus(incoming)|Basal Nuclei(incoming)|Bed nuclei of the stria terminalis(incoming)|Bed nuclei of the stria terminalis anterior division(incoming)|Bed nuclei of the stria terminalis rhomboid nucleus(incom…	175	26	Pallidum_ medial region	47.4355	56.6022	53.1653
Lateral habenula	FALSE	FALSE	-13902.5	159	|Anterior cingulate area(incoming)|Anterior hypothalamic area(incoming)|Anterior hypothalamic central part(incoming)|Anterior hypothalamic nucleus(incoming)|Anterior hypothalamic posterior part(incoming)|Anterodorsal preoptic nucleus(incoming)|Anteroventral periventricular nucleus(incoming)|Anteroventral preoptic nucleus(incoming)|Basal Nuclei(incoming)|Bed nuclei of the stria terminalis(incoming…	110	91	[Lateral habenula]	70.8553	35.0755	52.8365
Anterior amygdaloid area	FALSE	FALSE	-17718.7	301	|Basal Nuclei(incoming)|Basomedial nucleus of the amygdala(incoming)|Basomedial nucleus of the amygdala anterior part(incoming)|Basomedial nucleus of the amygdala posterior part(incoming)|Bed nuclei of the stria terminalis(incoming)|Bed nuclei of the stria terminalis anterior division(incoming)|Bed nuclei of the stria terminalis anterior division dorsomedial nucleus(incoming)|Bed nuclei of the st…	89	43	[Anterior amygdalar area]	57.7176	64.711	37.4651
Anterodorsal preoptic nucleus	FALSE	FALSE	-32289.4	17	|Ammon Horn(incoming)|Anterior hypothalamic area(incoming)|Anterior hypothalamic central part(incoming)|Anterior hypothalamic nucleus(incoming)|Anteroventral periventricular nucleus(incoming)|Basal Nuclei(incoming)|Bed nuclei of the stria terminalis(incoming)|Bed nuclei of the stria terminalis anterior division(incoming)|Bed nuclei of the stria terminalis anterior division dorsomedial nucleus(inc…	148	6367	[Anterodorsal preoptic nucleus]	50.6471	55.9412	54.9412
Posterior hypothalamic nucleus	FALSE	FALSE	-34708	335	|Ammon Horn(incoming)|Anterior amygdaloid area(incoming)|Anterior cingulate area(incoming)|Anterior cingulate area ventral part(incoming)|Anterior hypothalamic area(incoming)|Anterior hypothalamic central part(incoming)|Anterior hypothalamic nucleus(incoming)|Anterior hypothalamic nucleus anterior part(incoming)|Anterior hypothalamic posterior part(incoming)|Anterior pretectal nucleus(incoming)|A…	208	771	[Posterior hypothalamic nucleus]	75.7254	55.3224	55.5493
Supratrigeminal nucleus	FALSE	FALSE	-16626.2	82	|Basal Nuclei(incoming)|Bed nuclei of the stria terminalis(incoming)|Bed nuclei of the stria terminalis anterior division(incoming)|Bed nuclei of the stria terminalis rhomboid nucleus(incoming)|Brain(incoming)|Cerebrum(incoming)|Pallidum(incoming)|Pallidum rostral region(incoming)	8	259	[Supratrigeminal nucleus]	104.744	46.8537	45.7317
Anterior olfactory nucleus	FALSE	FALSE	639.107	1805	|Ammon Horn(incoming)|Basal Nuclei(incoming)|Basomedial nucleus of the amygdala(incoming)|Basomedial nucleus of the amygdala posterior part(incoming)|Bed nuclei of the stria terminalis(incoming)|Bed nuclei of the stria terminalis anterior division(incoming)|Bed nuclei of the stria terminalis rhomboid nucleus(incoming)|Brain(incoming)|Brainstem(incoming)|Cerebral cortex(incoming)|Cerebral cortex, …	52	22	[Anterior olfactory nucleus]	26.7413	48.7086	45.338
Median preoptic nucleus	FALSE	FALSE	-31021.6	50	|Anterior hypothalamic area(incoming)|Anterodorsal preoptic nucleus(incoming)|Anteroventral periventricular nucleus(incoming)|Anteroventral preoptic nucleus(incoming)|Basal Nuclei(incoming)|Basomedial nucleus of the amygdala(incoming)|Basomedial nucleus of the amygdala anterior part(incoming)|Bed nuclei of the stria terminalis(incoming)|Bed nuclei of the stria terminalis anterior division(incomin…	149	3697	[Median preoptic nucleus]	50.06	57.08	56.56
Nucleus of the optic tract	FALSE	FALSE	-18322.7	85	|Anterior group of the dorsal thalamus(incoming)|Brain(incoming)|Brainstem(incoming)|Cerebral cortex(incoming)|Cerebral cortex, layers1-6a [cortical plate](incoming)|Cerebrum(incoming)|Cuneiform nucleus(incoming)|Dorsal Thalamus(incoming)|Dorsal part of the lateral geniculate complex(incoming)|Geniculate group of the dorsal thalamus(incoming)|Geniculate group of the ventral thalamus(incoming)|Hyp…	99	48	[Nucleus of the optic tract]	82.6471	31.3882	44.8941
Tegmental reticular nucleus	FALSE	FALSE	-19136	283	|Anterior cingulate area(incoming)|Anterior cingulate area dorsal part(incoming)|Anterior pretectal nucleus(incoming)|Brain(incoming)|Brainstem(incoming)|Cerebellar cortex(incoming)|Cerebellum(incoming)|Cerebral cortex(incoming)|Cerebral cortex, layers1-6a [cortical plate](incoming)|Cerebrum(incoming)|Flocculus(incoming)|Hemispheric regions(incoming)|Hippocampal formation(incoming)|Hypothalamus(i…	77	144	[Tegmental reticular nucleus]	94.2367	61.735	54.5583
Barrington nucleus	FALSE	FALSE	-13184.8	13	|Anterior hypothalamic area(incoming)|Anteroventral periventricular nucleus(incoming)|Anteroventral preoptic nucleus(incoming)|Basal Nuclei(incoming)|Bed nuclei of the stria terminalis(incoming)|Bed nuclei of the stria terminalis anterior division(incoming)|Bed nuclei of the stria terminalis anterior division dorsomedial nucleus(incoming)|Bed nuclei of the stria terminalis anterior division magno…	50	911	[Barrington's nucleus]	107.615	42.7692	51.1538
Olivary pretectal nucleus	FALSE	FALSE	-10353.2	28	|Anterior group of the dorsal thalamus(incoming)|Anterior pretectal nucleus(incoming)|Brain(incoming)|Brainstem(incoming)|Central gray of the brain(incoming)|Cerebral cortex(incoming)|Cerebral cortex, layers1-6a [cortical plate](incoming)|Cerebrum(incoming)|Dorsal Thalamus(incoming)|Dorsal part of the lateral geniculate complex(incoming)|Dorsal tegmental nucleus(incoming)|Geniculate group of the …	43	161	[Olivary pretectal nucleus]	79.0357	30.0714	51.5357
Dorsal tegmental nucleus	FALSE	FALSE	-30365.8	45	|Brain(incoming)|Brainstem(incoming)|Central gray of the brain(incoming)|Central lateral nucleus of the thalamus(incoming)|Cerebral cortex(incoming)|Cerebral cortex, layers1-6a [cortical plate](incoming)|Cerebrum(incoming)|Dorsal Thalamus(incoming)|Dorsal part of the lateral geniculate complex(incoming)|Dorsal premammillary nucleus(incoming)|Dorsal tegmental nucleus(incoming)|Geniculate group of …	136	2016	[Dorsal tegmental nucleus]	105.511	41.3111	56.4667
Pontine central gray	FALSE	FALSE	-20390.1	294	|Anterodorsal preoptic nucleus(incoming)|Anteroventral periventricular nucleus(incoming)|Anteroventral preoptic nucleus(incoming)|Basal Nuclei(incoming)|Bed nuclei of the stria terminalis(incoming)|Bed nuclei of the stria terminalis anterior division(incoming)|Bed nuclei of the stria terminalis anterior division dorsomedial nucleus(incoming)|Bed nuclei of the stria terminalis anterior division fu…	83	156	[Pontine central gray]	107.483	43.3095	53.5782
Cerebellar cortex	FALSE	FALSE	-7275.08	21119	|Brain(incoming)|Dorsal accessory olive(incoming)|Inferior olivary complex(incoming)|Medial accessory olive(incoming)|Midbrain-Hindbrain(incoming)|Pontine gray(incoming)|Pre-Post Cerebellar nuclei(incoming)|Principal olive(incoming)|Abducens nucleus(outgoing)|Brain(outgoing)|Central gray of the brain(outgoing)|Cranial and Spinal Nerves (and Related)(outgoing)|Dorsal terminal nucleus of the access…	54	1	[Cerebellar cortex]	117.236	34.7099	39.3941
Cochlear nuclei	FALSE	FALSE	-6707.26	668	|Brain(incoming)|Midbrain-Hindbrain(incoming)|Midbrain-Hindbrain, Sensory(incoming)|Midbrain-Hindbrain, Sensory, Auditory(incoming)|Midbrain-Hindbrain, Sensory, Visual(incoming)|Superior colliculus(incoming)|Superior olivary complex periolivary region(incoming)|Ventral coclear nucleus(incoming)|Ventral coclear nucleus anterior part(incoming)|Brain(outgoing)|Dorsal coclear nucleus(outgoing)|Inferi…	21	25	[Cochlear nuclei]	110.275	52.2695	34.5599
Parageminal nucleus	FALSE	FALSE	-10238.8	24	|Anterior pretectal nucleus(incoming)|Brain(incoming)|Brainstem(incoming)|Central gray of the brain(incoming)|Dorsal Thalamus(incoming)|Dorsal part of the lateral geniculate complex(incoming)|Dorsal tegmental nucleus(incoming)|Geniculate group of the dorsal thalamus(incoming)|Geniculate group of the ventral thalamus(incoming)|Interbrain(incoming)|Lateral group of the dorsal thalamus(incoming)|Lat…	28	169	[Parabigeminal nucleus]	94.5417	42.4167	39.0833
Lateral septal nucleus	FALSE	FALSE	-27816.6	1122	|Ammon Horn(incoming)|Anterior hypothalamic area(incoming)|Anterior hypothalamic central part(incoming)|Anterior hypothalamic dorsal part(incoming)|Anterior hypothalamic nucleus(incoming)|Anterior hypothalamic nucleus anterior part(incoming)|Anterior hypothalamic posterior part(incoming)|Anterior periventricular nucleus of the hypothalamus(incoming)|Anterodorsal preoptic nucleus(incoming)|Anterov…	314	64	[Lateral septal nucleus]	47.7264	41.8084	52.5312
Abducens nucleus	FALSE	TRUE	-34576.9	7	|Brain(incoming)|Cerebellar cortex(incoming)|Cerebellum(incoming)|Flocculus(incoming)|Hemispheric regions(incoming)	5	1708	[Abducens nucleus]	108.571	50.8571	54.2857
Central linear nucleus raphe	FALSE	FALSE	-34670.2	357	|Anterior cingulate area(incoming)|Basal Nuclei(incoming)|Bed nuclei of the stria terminalis(incoming)|Bed nuclei of the stria terminalis anterior division(incoming)|Bed nuclei of the stria terminalis anterior division dorsomedial nucleus(incoming)|Bed nuclei of the stria terminalis anterior division fusiform nucleus(incoming)|Bed nuclei of the stria terminalis anterior division magnocellular nuc…	53	3315	[Midbrain raphé nuclei, Central linear nucleus raphé]	89.7879	50.4848	56.303
Facial nucleus	FALSE	TRUE	-8868.71	255	|Anterior pretectal nucleus(incoming)|Basal Nuclei(incoming)|Bed nuclei of the stria terminalis(incoming)|Bed nuclei of the stria terminalis anterior division(incoming)|Bed nuclei of the stria terminalis rhomboid nucleus(incoming)|Brain(incoming)|Brainstem(incoming)|Cerebellar cortex(incoming)|Cerebellum(incoming)|Cerebrum(incoming)|Dorsal Thalamus(incoming)|Flocculus(incoming)|Hemispheric region…	28	90	[Facial motor nucleus]	110.098	63.9686	45.3765
Anterior hypothalamic nucleus	FALSE	FALSE	-37985.5	314	|Ammon Horn(incoming)|Anterior hypothalamic area(incoming)|Anterior hypothalamic central part(incoming)|Anterior hypothalamic nucleus anterior part(incoming)|Anterior hypothalamic posterior part(incoming)|Anterodorsal preoptic nucleus(incoming)|Anteroventral periventricular nucleus(incoming)|Anteroventral preoptic nucleus(incoming)|Basal Nuclei(incoming)|Basomedial nucleus of the amygdala(incomin…	250	246	[Anterior hypothalamic nucleus]	60.7357	62.3758	52.7611
Caudoputamen	FALSE	FALSE	-17703.1	10105	|Agranular insular area(incoming)|Agranular insular area dorsal part(incoming)|Agranular insular area posterior part(incoming)|Anterior cingulate area(incoming)|Anterior cingulate area dorsal part(incoming)|Basal Nuclei(incoming)|Basomedial nucleus of the amygdala(incoming)|Basomedial nucleus of the amygdala posterior part(incoming)|Bed nuclei of the stria terminalis(incoming)|Bed nuclei of the s…	89	7	[Caudoputamen]	53.9724	43.17	35.8272
Ventromedial nucleus of the hypothalamus	FALSE	FALSE	-24215.3	187	|Ammon Horn(incoming)|Anterior hypothalamic area(incoming)|Anterior hypothalamic central part(incoming)|Anterior hypothalamic nucleus(incoming)|Anterior hypothalamic nucleus anterior part(incoming)|Anterior hypothalamic posterior part(incoming)|Anterior pretectal nucleus(incoming)|Anterodorsal preoptic nucleus(incoming)|Anteroventral preoptic nucleus(incoming)|Basal Nuclei(incoming)|Basomedial nu…	236	458	[Ventromedial hypothalamic nucleus]	68.0214	66.8182	53.9893
Medial mammillary nucleus	FALSE	FALSE	-27110.1	167	|Ammon Horn(incoming)|Anterior group of the dorsal thalamus(incoming)|Anterior hypothalamic area(incoming)|Anterior hypothalamic central part(incoming)|Anterior hypothalamic nucleus(incoming)|Anterior hypothalamic nucleus anterior part(incoming)|Anterior hypothalamic posterior part(incoming)|Anterodorsal nucleus of the thalamus(incoming)|Anterodorsal preoptic nucleus(incoming)|Anteromedial nucleu…	128	322	[Medial mammillary nucleus]	80.1677	62.5988	55.4251
Inferior olivary complex	FALSE	FALSE	-13069.8	344	|Brain(incoming)|Brainstem(incoming)|Cerebellar cortex(incoming)|Cerebellum(incoming)|Cerebral cortex(incoming)|Cerebral cortex, layers1-6a [cortical plate](incoming)|Cerebrum(incoming)|Flocculus(incoming)|Hemispheric regions(incoming)|Hypothalamus(incoming)|Interbrain(incoming)|Lateral hypothalamic area(incoming)|Lateral zone of the hypothalamus(incoming)|Medial terminal nucleus of the accessory…	75	184	[Inferior olivary complex]	121.471	70.2006	54.1192
Spinal nucleus of the trigeminal interpolar part	FALSE	FALSE	-14016.4	669	|Basal Nuclei(incoming)|Bed nuclei of the stria terminalis(incoming)|Bed nuclei of the stria terminalis anterior division(incoming)|Bed nuclei of the stria terminalis rhomboid nucleus(incoming)|Brain(incoming)|Cerebrum(incoming)|Midbrain-Hindbrain(incoming)|Midbrain-Hindbrain, Sensory(incoming)|Midbrain-Hindbrain, Sensory, Visual(incoming)|Pallidum(incoming)|Pallidum rostral region(incoming)|Supe…	12	46	[Spinal nucleus of the trigeminal_ interpolar part]	121.973	56.4305	40.287
Accessory olfactory bulb	FALSE	FALSE	5077.82	302	|Basal Nuclei(incoming)|Brain(incoming)|Cerebral cortex(incoming)|Cerebral cortex, layers1-6a [cortical plate](incoming)|Cerebrum(incoming)|Cortical nucleus of the amygdala(incoming)|Cortical nucleus of the amygdala posterior part(incoming)|Cortical nucleus of the amygdala posterior part medial zone(incoming)|Medial nucleus of the amygdala(incoming)|Medial nucleus of the amygdala anterodorsal par…	19	136	[Accessory olfactory bulb]	18.3377	33.1457	45.2583
Spinal nucleus of the trigeminal caudal part	FALSE	FALSE	-12811.4	255	|Brain(incoming)|Brainstem(incoming)|Central lateral nucleus of the thalamus(incoming)|Dorsal Thalamus(incoming)|Interbrain(incoming)|Intralaminar nuclei of the dorsal thalamus(incoming)|Thalamus(incoming)|Ventral group of the dorsal thalamus(incoming)|Ventral posterior complex of the thalamus(incoming)|Ventral thalamus(incoming)|Zona incerta(incoming)|Brain(outgoing)|Brainstem(outgoing)|Central …	18	76	[Spinal nucleus of the trigeminal_ caudal part]	128.502	54.7216	40.5608
Interpeduncular nucleus	FALSE	FALSE	-18808	116	|Brain(incoming)|Brainstem(incoming)|Central gray of the brain(incoming)|Central lateral nucleus of the thalamus(incoming)|Cerebral cortex(incoming)|Cerebral cortex, layers1-6a [cortical plate](incoming)|Cerebrum(incoming)|Dorsal Thalamus(incoming)|Dorsal nucleus raphe(incoming)|Dorsal tegmental nucleus(incoming)|Dorsomedial nucleus of the hypothalamus(incoming)|Hippocampal formation(incoming)|Hy…	50	706	[Interpeduncular nucleus]	86.3276	57.0948	55.6897
Medial nucleus of the amygdala	FALSE	FALSE	-12664.7	641	|Anterior amygdaloid area(incoming)|Anterior hypothalamic area(incoming)|Anterior hypothalamic central part(incoming)|Anterior hypothalamic nucleus(incoming)|Anterodorsal preoptic nucleus(incoming)|Anteroventral periventricular nucleus(incoming)|Anteroventral preoptic nucleus(incoming)|Basal Nuclei(incoming)|Basomedial nucleus of the amygdala(incoming)|Basomedial nucleus of the amygdala anterior …	264	35	[Medial amygdalar nucleus]	68.7785	62.1466	38.5023
Pedunculopontine nucleus	FALSE	FALSE	-28129.9	265	|Anterior hypothalamic area(incoming)|Anterior hypothalamic nucleus(incoming)|Anterior pretectal nucleus(incoming)|Anteroventral preoptic nucleus(incoming)|Basal Nuclei(incoming)|Bed nuclei of the stria terminalis(incoming)|Bed nuclei of the stria terminalis anterior division(incoming)|Bed nuclei of the stria terminalis anterior division dorsomedial nucleus(incoming)|Bed nuclei of the stria termi…	99	122	[Pedunculopontine nucleus]	98.117	46.9887	46.7208
Lateral posterior nucleus of the thalamus	FALSE	FALSE	-15049.1	403	|Anterior cingulate area(incoming)|Anterior cingulate area dorsal part(incoming)|Anterior hypothalamic area(incoming)|Anterior pretectal nucleus(incoming)|Anterolateral visual area(incoming)|Anteromedial visual area(incoming)|Brain(incoming)|Brainstem(incoming)|Central gray of the brain(incoming)|Cerebral cortex(incoming)|Cerebral cortex, layers1-6a [cortical plate](incoming)|Cerebrum(incoming)|D…	98	17	[Lateral posterior nucleus of the thalamus]	76.1489	34.5881	43.3151
Nucleus of the lateral olfactory tract	FALSE	FALSE	-10051.3	186	|Basal Nuclei(incoming)|Basomedial nucleus of the amygdala(incoming)|Basomedial nucleus of the amygdala anterior part(incoming)|Basomedial nucleus of the amygdala posterior part(incoming)|Brain(incoming)|Cerebral cortex(incoming)|Cerebral cortex, layers1-6a [cortical plate](incoming)|Cerebrum(incoming)|Entorhinal area(incoming)|Entorhinal area, lateral part(incoming)|Hippocampal formation(incomin…	19	74	[Nucleus of the lateral olfactory tract]	60.2742	68.371	38.3978
Subcoeruleus nucleus	FALSE	FALSE	-28540.6	14	|Basal Nuclei(incoming)|Brain(incoming)|Cerebral cortex(incoming)|Cerebral cortex, layers1-6a [cortical plate](incoming)|Cerebrum(incoming)|Infralimbic area(incoming)|Medial terminal nucleus of the accessory optic tract(incoming)|Midbrain-Hindbrain(incoming)|Midbrain-Hindbrain, Sensory(incoming)|Midbrain-Hindbrain, Sensory, Visual(incoming)|Pallidum(incoming)|Pallidum ventral region(incoming)|Pre…	14	1312	[Subceruleus nucleus]	104.643	45.5714	50
Suprageniculate nucleus	FALSE	FALSE	-32046	72	|Anterolateral visual area(incoming)|Brain(incoming)|Brainstem(incoming)|Central gray of the brain(incoming)|Cerebral cortex(incoming)|Cerebral cortex, layers1-6a [cortical plate](incoming)|Cerebrum(incoming)|Dorsal Thalamus(incoming)|Interbrain(incoming)|Lateral group of the dorsal thalamus(incoming)|Mediolateral visual area(incoming)|Midbrain-Hindbrain(incoming)|Midbrain-Hindbrain, Sensory(inco…	21	105	[Suprageniculate nucleus]	84.7222	39.375	39.7639
Nucleus incertus	FALSE	FALSE	-33307.2	71	|Anterior cingulate area(incoming)|Anterior cingulate area dorsal part(incoming)|Anterior cingulate area ventral part(incoming)|Basal Nuclei(incoming)|Bed nuclei of the stria terminalis(incoming)|Bed nuclei of the stria terminalis anterior division(incoming)|Bed nuclei of the stria terminalis anterior division ventral nucleus(incoming)|Brain(incoming)|Brainstem(incoming)|Central gray of the brain…	213	996	[Nucleus incertus]	106.493	46.9437	56.5352
Central nucleus of amygdala	FALSE	FALSE	-21574.7	504	|Anterior hypothalamic area(incoming)|Anterior hypothalamic central part(incoming)|Anterior hypothalamic nucleus(incoming)|Anteroventral periventricular nucleus(incoming)|Basal Nuclei(incoming)|Basomedial nucleus of the amygdala(incoming)|Basomedial nucleus of the amygdala anterior part(incoming)|Basomedial nucleus of the amygdala posterior part(incoming)|Bed nuclei of the stria terminalis(incomi…	172	35	[Central amygdalar nucleus]	65.3155	57.3433	33.2262
Interposed nucleus	FALSE	FALSE	-10619.1	298	|Brain(incoming)|Brainstem(incoming)|Central gray of the brain(incoming)|Geniculate group of the ventral thalamus(incoming)|Inferior olivary complex(incoming)|Interbrain(incoming)|Medial accessory olive(incoming)|Midbrain-Hindbrain(incoming)|Midbrain-Hindbrain, Sensory(incoming)|Midbrain-Hindbrain, Sensory, Visual(incoming)|Periaqueductal gray(incoming)|Pontine reticular nucleus(incoming)|Pontine…	25	44	[Interposed nucleus]	116.664	39.6611	41.8792
Nucleus of the brachium of the inferior colliculus	FALSE	FALSE	-24256.9	65	|Anterior pretectal nucleus(incoming)|Brain(incoming)|Central gray of the brain(incoming)|Midbrain-Hindbrain(incoming)|Midbrain-Hindbrain, Sensory(incoming)|Midbrain-Hindbrain, Sensory, Visual(incoming)|Periaqueductal gray(incoming)|Pretectal region(incoming)|Reticular core(incoming)|Superior colliculus(incoming)|Brain(outgoing)|Inferior olivary complex(outgoing)|Midbrain-Hindbrain(outgoing)|Pre-…	14	182	[Nucleus of the brachium of the inferior colliculus]	90.1538	40.2769	38.8462
Substantia innominata	FALSE	FALSE	-23631.6	1416	|Agranular insular area(incoming)|Agranular insular area dorsal part(incoming)|Agranular insular area posterior part(incoming)|Ammon Horn(incoming)|Anterior cingulate area(incoming)|Anterior hypothalamic area(incoming)|Anterior hypothalamic central part(incoming)|Anterior hypothalamic nucleus(incoming)|Anteroventral periventricular nucleus(incoming)|Anteroventral preoptic nucleus(incoming)|Basal …	246	14	[Pallidum_ ventral region, Substantia innominata]	51.3833	60.5741	42.8509
Hypoglossal nucleus	FALSE	TRUE	-12352.9	152	|Basal Nuclei(incoming)|Bed nuclei of the stria terminalis(incoming)|Bed nuclei of the stria terminalis anterior division(incoming)|Bed nuclei of the stria terminalis rhomboid nucleus(incoming)|Brain(incoming)|Cerebrum(incoming)|Pallidum(incoming)|Pallidum rostral region(incoming)	8	634	[Hypoglossal nucleus]	126.158	54.0526	56.0658
Interanterodorsal nucleus of the thalamus	FALSE	FALSE	-30993.1	72	|Anterior hypothalamic area(incoming)|Anterior hypothalamic central part(incoming)|Anterior hypothalamic nucleus(incoming)|Anterior hypothalamic nucleus anterior part(incoming)|Brain(incoming)|Brainstem(incoming)|Central gray of the brain(incoming)|Hypothalamus(incoming)|Interbrain(incoming)|Lateral preoptic area(incoming)|Lateral zone of the hypothalamus(incoming)|Medial zone of the hypothalamus…	16	130	[Interanterodorsal nucleus of the thalamus]	61.6111	42.9722	52.6944
Area postrema	FALSE	FALSE	-20407.3	21	|Brain(incoming)|Brainstem(incoming)|Dorsomedial nucleus of the hypothalamus(incoming)|Hypothalamus(incoming)|Interbrain(incoming)|Periventricular zone of the hypothalamus(incoming)|Brain(outgoing)|Midbrain-Hindbrain(outgoing)|Paragigantocellular reticular nucleus(outgoing)|Paragigantocellular reticular nucleus lateral part(outgoing)|Reticular core(outgoing)|Reticular formation(outgoing)	12	2709	[Area postrema]	128.095	48.619	57.6667
Anteroventral periventricular nucleus	FALSE	FALSE	-29497.3	32	|Ammon Horn(incoming)|Anterior hypothalamic area(incoming)|Anterior hypothalamic central part(incoming)|Anterior hypothalamic nucleus(incoming)|Anteroventral preoptic nucleus(incoming)|Basal Nuclei(incoming)|Bed nuclei of the stria terminalis(incoming)|Bed nuclei of the stria terminalis anterior division(incoming)|Bed nuclei of the stria terminalis anterior division dorsomedial nucleus(incoming)|…	169	3252	[Anteroventral periventricular nucleus]	51.5	64.1562	56.125
Inferior colliculus	FALSE	FALSE	-11908.8	2367	|Anterior pretectal nucleus(incoming)|Auditory areas(incoming)|Brain(incoming)|Brainstem(incoming)|Central gray of the brain(incoming)|Cerebral cortex(incoming)|Cerebral cortex, layers1-6a [cortical plate](incoming)|Cerebrum(incoming)|Cochlear nuclei(incoming)|Dorsal Thalamus(incoming)|Hypothalamus(incoming)|Interbrain(incoming)|Medial preoptic area(incoming)|Medial preoptic nucleus(incoming)|Med…	39	7	[Inferior colliculus]	104.75	24.0731	45.2387
Interanteromedial nucleus of the thalamus	FALSE	FALSE	-37557	29	|Ammon Horn(incoming)|Anterior cingulate area(incoming)|Basal Nuclei(incoming)|Bed nuclei of the stria terminalis(incoming)|Bed nuclei of the stria terminalis anterior division(incoming)|Bed nuclei of the stria terminalis anterior division dorsomedial nucleus(incoming)|Bed nuclei of the stria terminalis rhomboid nucleus(incoming)|Bed nuclei of the stria terminalis, anterior division, subcommisura…	55	1648	[Interanteromedial nucleus of the thalamus]	60.8276	47.3793	55.5172
Nucleus ambiguus	TRUE	TRUE	-18928.3		|Basal Nuclei(incoming)|Bed nuclei of the stria terminalis(incoming)|Bed nuclei of the stria terminalis anterior division(incoming)|Bed nuclei of the stria terminalis rhomboid nucleus(incoming)|Brain(incoming)|Cerebellar cortex(incoming)|Cerebellum(incoming)|Cerebrum(incoming)|Flocculus(incoming)|Hemispheric regions(incoming)|Midbrain-Hindbrain(incoming)|Midbrain-Hindbrain, Sensory(incoming)|Midb…	16	397	Nucleus ambiguus	120.932	64.5811	46.1892
Intermediodorsal nucleus of the thalamus	FALSE	FALSE	-35042.9	97	|Anterior cingulate area(incoming)|Basal Nuclei(incoming)|Bed nuclei of the stria terminalis(incoming)|Bed nuclei of the stria terminalis anterior division(incoming)|Bed nuclei of the stria terminalis anterior division dorsomedial nucleus(incoming)|Bed nuclei of the stria terminalis anterior division magnocellular nucleus(incoming)|Bed nuclei of the stria terminalis anterior division ventral nucl…	44	2937	[Intermediodorsal nucleus of the thalamus]	70.2887	42.3918	56.6495
Red nucleus	FALSE	TRUE	-21687	169	|Anterior pretectal nucleus(incoming)|Brain(incoming)|Brainstem(incoming)|Central gray of the brain(incoming)|Dorsal Thalamus(incoming)|Hypothalamus(incoming)|Interbrain(incoming)|Interstitial nucleus of Cajal(incoming)|Lateral group of the dorsal thalamus(incoming)|Medial preoptic area(incoming)|Medial preoptic nucleus(incoming)|Medial zone of the hypothalamus(incoming)|Midbrain-Hindbrain(incomi…	30	176	[Red Nucleus]	86.3136	48.6864	51.1716
Ventral part of the lateral geniculate complex	FALSE	FALSE	-14587.7	226	|Anterior group of the dorsal thalamus(incoming)|Anterior hypothalamic area(incoming)|Anterior hypothalamic central part(incoming)|Anterior hypothalamic nucleus(incoming)|Anterior pretectal nucleus(incoming)|Anterolateral visual area(incoming)|Brain(incoming)|Brainstem(incoming)|Central gray of the brain(incoming)|Cerebral cortex(incoming)|Cerebral cortex, layers1-6a [cortical plate](incoming)|Ce…	132	46	[Ventral part of the lateral geniculate complex]	77.6062	42.9292	34.4027
Dentate gyrus	FALSE	FALSE	-586.066	2319	|Ammon Horn(incoming)|Anterior cingulate area(incoming)|Basal Nuclei(incoming)|Brain(incoming)|Brainstem(incoming)|Central gray of the brain(incoming)|Cerebral cortex(incoming)|Cerebral cortex, layers1-6a [cortical plate](incoming)|Cerebrum(incoming)|Dentate gyrus(incoming)|Dentate gyrus lateral blade(incoming)|Dentate gyrus lateral blade polymorph layer(incoming)|Dorsal tegmental nucleus(incomin…	72	3	[Dentate gyrus]	82.2277	36.539	37.9828
Supramammillary nucleus	FALSE	FALSE	-26387.9	116	|Ammon Horn(incoming)|Anterior amygdaloid area(incoming)|Anterior cingulate area(incoming)|Anterior group of the dorsal thalamus(incoming)|Anterior hypothalamic area(incoming)|Anterior hypothalamic central part(incoming)|Anterior hypothalamic nucleus(incoming)|Anterior hypothalamic nucleus anterior part(incoming)|Anterior hypothalamic posterior part(incoming)|Anterodorsal nucleus of the thalamus(…	205	305	[Supramammillary nucleus]	78.8879	59.181	54.1121
Magnocellular preoptic nucleus	FALSE	FALSE	-12867.4	1416	|Anterior cingulate area(incoming)|Basal Nuclei(incoming)|Bed nuclei of the stria terminalis(incoming)|Bed nuclei of the stria terminalis anterior division(incoming)|Bed nuclei of the stria terminalis anterolateral area(incoming)|Bed nuclei of the stria terminalis rhomboid nucleus(incoming)|Bed nuclei of the stria terminalis, anterior division, subcommisural zone(incoming)|Brain(incoming)|Brainst…	94	51	[Pallidum_ ventral region, Magnocellular nucleus]	53.1379	65.7069	43.0057
Oculomotor nucleus	FALSE	TRUE	-22000.2	26	|Anterior pretectal nucleus(incoming)|Brain(incoming)|Brainstem(incoming)|Cerebellar cortex(incoming)|Cerebellum(incoming)|Cerebral cortex(incoming)|Cerebral cortex, layers1-6a [cortical plate](incoming)|Cerebrum(incoming)|Flocculus(incoming)|Hemispheric regions(incoming)|Hypothalamus(incoming)|Interbrain(incoming)|Medial preoptic area(incoming)|Medial preoptic nucleus(incoming)|Medial terminal n…	27	3596	[Oculomotor nucleus]	91.8462	42.0769	55.9615
Trochlear nucleus	FALSE	TRUE	-28871.6	4	|Brain(incoming)|Cerebellar cortex(incoming)|Cerebellum(incoming)|Flocculus(incoming)|Hemispheric regions(incoming)	5	2079	[Trochlear nucleus]	96.5	42.5	55
Interstitial nucleus of Cajal	FALSE	FALSE	-29379.7	4	|Brain(incoming)|Brainstem(incoming)|Cerebral cortex(incoming)|Cerebral cortex, layers1-6a [cortical plate](incoming)|Cerebrum(incoming)|Dorsal Thalamus(incoming)|Infralimbic area(incoming)|Interbrain(incoming)|Lateral group of the dorsal thalamus(incoming)|Medial terminal nucleus of the accessory optic tract(incoming)|Midbrain-Hindbrain(incoming)|Midbrain-Hindbrain, Sensory(incoming)|Midbrain-Hi…	34	2477	[Interstitial nucleus of Cajal]	86	42.75	54
Reticular nucleus of the thalamus	FALSE	FALSE	-21659.9	644	|Anterior cingulate area(incoming)|Anterior cingulate area dorsal part(incoming)|Anterior group of the dorsal thalamus(incoming)|Anterodorsal nucleus of the thalamus(incoming)|Anterolateral visual area(incoming)|Basal Nuclei(incoming)|Brain(incoming)|Brainstem(incoming)|Cerebral cortex(incoming)|Cerebral cortex, layers1-6a [cortical plate](incoming)|Cerebrum(incoming)|Dorsal Thalamus(incoming)|Do…	119	17	[Reticular nucleus of the thalamus, Thalamus_ polymodal association cortex related]	64.9783	44.5388	40.2811
Dorsal part of the lateral geniculate complex	FALSE	FALSE	-11106.9	227	|Anterolateral visual area(incoming)|Anteromedial visual area(incoming)|Brain(incoming)|Brainstem(incoming)|Central gray of the brain(incoming)|Cerebral cortex(incoming)|Cerebral cortex, layers1-6a [cortical plate](incoming)|Cerebrum(incoming)|Dorsal Thalamus(incoming)|Dorsal tegmental nucleus(incoming)|Geniculate group of the dorsal thalamus(incoming)|Geniculate group of the ventral thalamus(inc…	85	46	[Dorsal part of the lateral geniculate complex]	77.185	36.2203	36.7709
Nucleus x	FALSE	FALSE	-17962.2	27	|Brain(incoming)|Cerebellar cortex(incoming)|Cerebellum(incoming)|Flocculus(incoming)|Hemispheric regions(incoming)	5	312	[Nucleus x]	115.111	50.1852	41.8148
Lateral vestibular nucleus	FALSE	TRUE	-7605.63	219	|Brain(incoming)|Cerebellar cortex(incoming)|Cerebellum(incoming)|Flocculus(incoming)|Hemispheric regions(incoming)|Medial terminal nucleus of the accessory optic tract(incoming)|Midbrain-Hindbrain(incoming)|Midbrain-Hindbrain, Sensory(incoming)|Midbrain-Hindbrain, Sensory, Visual(incoming)	9	92	[Lateral vestibular nucleus]	112.584	47.4932	44.5068
Lateral dorsal nucleus of thalamus	FALSE	FALSE	-9060.37	378	|Ammon Horn(incoming)|Anterior cingulate area(incoming)|Anterior cingulate area dorsal part(incoming)|Anterior cingulate area ventral part(incoming)|Anterior hypothalamic area(incoming)|Anterior hypothalamic central part(incoming)|Anterior hypothalamic nucleus(incoming)|Anterior pretectal nucleus(incoming)|Anterolateral visual area(incoming)|Anteromedial visual area(incoming)|Brain(incoming)|Brai…	114	23	[Lateral dorsal nucleus of thalamus]	67.3228	34.7354	43.828
Dentate nucleus	FALSE	FALSE	-11778.8	155	|Brain(incoming)|Brainstem(incoming)|Central gray of the brain(incoming)|Dorsal Thalamus(incoming)|Interbrain(incoming)|Lateral group of the dorsal thalamus(incoming)|Lateral posterior nucleus of the thalamus(incoming)|Midbrain-Hindbrain(incoming)|Midbrain-Hindbrain, Sensory(incoming)|Midbrain-Hindbrain, Sensory, Visual(incoming)|Periaqueductal gray(incoming)|Pontine reticular nucleus(incoming)|P…	23	68	[Dentate nucleus]	114.161	42.0774	35.3742
Septofimbrial nucleus	FALSE	FALSE	-28743.8	157	|Ammon Horn(incoming)|Anterior hypothalamic area(incoming)|Anterior hypothalamic central part(incoming)|Anterior hypothalamic nucleus(incoming)|Anterior hypothalamic posterior part(incoming)|Anterodorsal preoptic nucleus(incoming)|Basal Nuclei(incoming)|Bed nuclei of the stria terminalis(incoming)|Bed nuclei of the stria terminalis anterior division(incoming)|Bed nuclei of the stria terminalis rh…	114	88	[Septofimbrial nucleus]	55.6369	37.6752	52.9172
Principal sensory nucleus of the trigeminal	FALSE	FALSE	-19451.2	480	|Brain(incoming)|Brainstem(incoming)|Cerebral cortex(incoming)|Cerebral cortex, layers1-6a [cortical plate](incoming)|Cerebrum(incoming)|Dorsal Thalamus(incoming)|Interbrain(incoming)|Lateral group of the dorsal thalamus(incoming)|Midbrain-Hindbrain(incoming)|Midbrain-Hindbrain, Sensory(incoming)|Midbrain-Hindbrain, Sensory, Visual(incoming)|Posterior complex of the thalamus(incoming)|Primary mot…	21	44	[Principal sensory nucleus of the trigeminal]	104.217	56.5125	41.2375
Dorsal nucleus raphe	FALSE	FALSE	-23184.9	357	|Anterior cingulate area(incoming)|Anterodorsal preoptic nucleus(incoming)|Anteroventral periventricular nucleus(incoming)|Anteroventral preoptic nucleus(incoming)|Basal Nuclei(incoming)|Bed nuclei of the stria terminalis(incoming)|Bed nuclei of the stria terminalis anterior division(incoming)|Bed nuclei of the stria terminalis anterior division dorsomedial nucleus(incoming)|Bed nuclei of the str…	199	2510	[Midbrain raphé nuclei, Dorsal nucleus raphé]	98.4464	40.6875	57.2411
Superior colliculus_ motor related	TRUE	TRUE	-20516		|Anterior group of the dorsal thalamus(incoming)|Anterior hypothalamic area(incoming)|Anterior hypothalamic central part(incoming)|Anterior hypothalamic nucleus(incoming)|Anterior hypothalamic nucleus anterior part(incoming)|Anterior hypothalamic posterior part(incoming)|Anterolateral visual area(incoming)|Basal Nuclei(incoming)|Bed nuclei of the stria terminalis(incoming)|Bed nuclei of the stria…	84	9	Superior colliculus_ motor related	91.6406	29.0703	48.5128
Subthalamic nucleus	FALSE	FALSE	-27712.3	125	|Anterior cingulate area(incoming)|Basal Nuclei(incoming)|Bed nuclei of the stria terminalis(incoming)|Bed nuclei of the stria terminalis anterior division(incoming)|Bed nuclei of the stria terminalis juxtacapsular nucleus(incoming)|Brain(incoming)|Brainstem(incoming)|Cerebral cortex(incoming)|Cerebral cortex, layers1-6a [cortical plate](incoming)|Cerebrum(incoming)|Hypothalamus(incoming)|Interbr…	34	106	[Subthalamic nucleus]	73.936	55.376	43.256
Locus coeruleus	FALSE	FALSE	-14957.3	22	|Anterior cingulate area(incoming)|Anterior pretectal nucleus(incoming)|Anterodorsal preoptic nucleus(incoming)|Anteroventral periventricular nucleus(incoming)|Basal Nuclei(incoming)|Bed nuclei of the stria terminalis(incoming)|Bed nuclei of the stria terminalis anterior division(incoming)|Bed nuclei of the stria terminalis anterior division dorsomedial nucleus(incoming)|Bed nuclei of the stria t…	137	728	[Locus ceruleus]	108.045	41.8182	49.6364
Ventral tegmental area	FALSE	FALSE	-22079.3	322	|Anterior cingulate area(incoming)|Anterior hypothalamic area(incoming)|Anterior hypothalamic central part(incoming)|Anterior hypothalamic nucleus(incoming)|Anterior pretectal nucleus(incoming)|Anteroventral periventricular nucleus(incoming)|Basal Nuclei(incoming)|Bed nuclei of the stria terminalis(incoming)|Bed nuclei of the stria terminalis anterior division(incoming)|Bed nuclei of the stria te…	199	58	[Ventral tegmental area]	82.6677	54.0559	51.4348
Tuberal nucleus	FALSE	FALSE	-18175.4	234	|Ammon Horn(incoming)|Anterior hypothalamic area(incoming)|Anterior hypothalamic central part(incoming)|Anterior hypothalamic nucleus(incoming)|Basal Nuclei(incoming)|Basomedial nucleus of the amygdala(incoming)|Basomedial nucleus of the amygdala anterior part(incoming)|Basomedial nucleus of the amygdala posterior part(incoming)|Bed nuclei of the stria terminalis(incoming)|Bed nuclei of the stria…	197	35	[Tuberal nucleus]	68.0214	68.0726	49.6453
Medial geniculate complex	FALSE	FALSE	-20658.4	320	|Anterior hypothalamic area(incoming)|Brain(incoming)|Brainstem(incoming)|Cerebral cortex(incoming)|Cerebral cortex, layers1-6a [cortical plate](incoming)|Cerebrum(incoming)|Dorsal Thalamus(incoming)|Dorsal part of the lateral geniculate complex(incoming)|Geniculate group of the dorsal thalamus(incoming)|Geniculate group of the ventral thalamus(incoming)|Hypothalamus(incoming)|Interbrain(incoming…	43	41	[Medial geniculate complex]	84.3844	41.4969	37.475
Cuneate nucleus	FALSE	FALSE	-13834.1	117	|Brain(incoming)|Central gray of the brain(incoming)|Midbrain-Hindbrain(incoming)|Periaqueductal gray(incoming)|Reticular core(incoming)	5	132	[Cuneate nucleus]	126.812	48.1026	49.7521
Anteroventral preoptic nucleus	FALSE	FALSE	-29421.6	30	|Anterior hypothalamic area(incoming)|Anterior hypothalamic central part(incoming)|Anterior hypothalamic nucleus(incoming)|Anterodorsal preoptic nucleus(incoming)|Anteroventral periventricular nucleus(incoming)|Anteroventral preoptic nucleus(incoming)|Basal Nuclei(incoming)|Bed nuclei of the stria terminalis(incoming)|Bed nuclei of the stria terminalis anterior division(incoming)|Bed nuclei of th…	164	1065	[Anteroventral preoptic nucleus]	50.4667	65.5667	53.2333
Superior colliculus_ sensory related	TRUE	FALSE	-7029.78		|Anterior group of the dorsal thalamus(incoming)|Brain(incoming)|Brainstem(incoming)|Cerebral cortex(incoming)|Cerebral cortex, layers1-6a [cortical plate](incoming)|Cerebrum(incoming)|Dorsal Thalamus(incoming)|Dorsal part of the lateral geniculate complex(incoming)|Geniculate group of the dorsal thalamus(incoming)|Geniculate group of the ventral thalamus(incoming)|Interbrain(incoming)|Lateral do…	40	11	Superior colliculus_ sensory related	92.5451	21.0082	49.8863
Pontine gray	FALSE	FALSE	-5129.62	406	|Anterior cingulate area(incoming)|Anterior cingulate area dorsal part(incoming)|Anterior pretectal nucleus(incoming)|Brain(incoming)|Brainstem(incoming)|Cerebellar cortex(incoming)|Cerebellum(incoming)|Cerebral cortex(incoming)|Cerebral cortex, layers1-6a [cortical plate](incoming)|Cerebrum(incoming)|Flocculus(incoming)|Geniculate group of the ventral thalamus(incoming)|Hemispheric regions(incom…	113	42	[Pontine gray]	89.9926	65.2118	51.6453
Parafascicular nucleus	FALSE	FALSE	-28458.5	214	|Anterior cingulate area(incoming)|Basal Nuclei(incoming)|Bed nuclei of the stria terminalis(incoming)|Bed nuclei of the stria terminalis anterior division(incoming)|Bed nuclei of the stria terminalis anterior division dorsomedial nucleus(incoming)|Bed nuclei of the stria terminalis anterior division magnocellular nucleus(incoming)|Bed nuclei of the stria terminalis oval nucleus(incoming)|Bed nuc…	93	153	[Parafascicular nucleus]	75.1869	41.4579	51.4766
Superior central nucleus raphe	FALSE	FALSE	-31524.6	357	|Anterior cingulate area(incoming)|Basal Nuclei(incoming)|Bed nuclei of the stria terminalis(incoming)|Bed nuclei of the stria terminalis anterior division(incoming)|Bed nuclei of the stria terminalis anterior division magnocellular nucleus(incoming)|Bed nuclei of the stria terminalis posterior division(incoming)|Bed nuclei of the stria terminalis posterior division transverse nucleus(incoming)|B…	126	632	[Midbrain raphé nuclei, Superior central nucleus raphé]	95.5084	54.4147	56.4682
Peripeduncular nucleus	FALSE	FALSE	-18363.1	50	|Anterior hypothalamic area(incoming)|Anterior hypothalamic central part(incoming)|Anterior hypothalamic nucleus(incoming)|Anterior hypothalamic posterior part(incoming)|Anterior pretectal nucleus(incoming)|Basal Nuclei(incoming)|Brain(incoming)|Brainstem(incoming)|Central gray of the brain(incoming)|Cerebral cortex(incoming)|Cerebral cortex, layers1-6a [cortical plate](incoming)|Cerebrum(incomin…	50	190	[Peripeduncular nucleus, Thalamus_ sensory-motor cortex related]	85.66	46.8	37.58
Cortical nucleus of the amygdala	FALSE	FALSE	-6122.22	947	|Ammon Horn(incoming)|Basal Nuclei(incoming)|Basomedial nucleus of the amygdala(incoming)|Basomedial nucleus of the amygdala anterior part(incoming)|Basomedial nucleus of the amygdala posterior part(incoming)|Bed nuclei of the stria terminalis(incoming)|Bed nuclei of the stria terminalis anterior division(incoming)|Bed nuclei of the stria terminalis anterior division dorsomedial nucleus(incoming)…	192	26	[Cortical amygdalar area]	73.7878	67.5787	33.8902
Central lateral nucleus of the thalamus	FALSE	FALSE	-22652.6	122	|Anterior cingulate area(incoming)|Anterior cingulate area dorsal part(incoming)|Anteroventral preoptic nucleus(incoming)|Basal Nuclei(incoming)|Brain(incoming)|Brainstem(incoming)|Central gray of the brain(incoming)|Cerebral cortex(incoming)|Cerebral cortex, layers1-6a [cortical plate](incoming)|Cerebrum(incoming)|Dorsal premammillary nucleus(incoming)|Dorsal tegmental nucleus(incoming)|Hypothal…	135	82	[Central lateral nucleus of the thalamus]	69.4754	37.4754	49.0492
Substantia nigra compact part	FALSE	FALSE	-16788.9	242	|Anterior cingulate area(incoming)|Basal Nuclei(incoming)|Bed nuclei of the stria terminalis(incoming)|Bed nuclei of the stria terminalis anterior division(incoming)|Bed nuclei of the stria terminalis anterior division dorsomedial nucleus(incoming)|Bed nuclei of the stria terminalis anterolateral area(incoming)|Bed nuclei of the stria terminalis juxtacapsular nucleus(incoming)|Bed nuclei of the s…	112	16	[Substantia nigra_ compact part]	84.9545	52.5826	44.7231
Fundus of the striatum	FALSE	FALSE	-27768.9	188	|Agranular insular area(incoming)|Agranular insular area dorsal part(incoming)|Agranular insular area posterior part(incoming)|Basal Nuclei(incoming)|Basomedial nucleus of the amygdala(incoming)|Basomedial nucleus of the amygdala anterior part(incoming)|Basomedial nucleus of the amygdala posterior part(incoming)|Bed nuclei of the stria terminalis(incoming)|Bed nuclei of the stria terminalis anter…	62	82	[Fundus of striatum]	53.1064	60.0106	36.7926
Medial habenula	FALSE	FALSE	-6083.89	108	|Basal Nuclei(incoming)|Bed nuclei of the stria terminalis(incoming)|Bed nuclei of the stria terminalis anterior division(incoming)|Bed nuclei of the stria terminalis anterior division fusiform nucleus(incoming)|Bed nuclei of the stria terminalis posterior division(incoming)|Bed nuclei of the stria terminalis posterior division principal nucleus(incoming)|Brain(incoming)|Brainstem(incoming)|Cereb…	25	577	[Medial habenula]	68.5	33.463	55.2685
Anteroventral nucleus of thalamus	FALSE	FALSE	-16618.2	188	|Ammon Horn(incoming)|Anterior cingulate area(incoming)|Anterior cingulate area dorsal part(incoming)|Anterior cingulate area ventral part(incoming)|Basal Nuclei(incoming)|Bed nuclei of the stria terminalis(incoming)|Bed nuclei of the stria terminalis posterior division(incoming)|Bed nuclei of the stria terminalis posterior division principal nucleus(incoming)|Brain(incoming)|Brainstem(incoming)|…	75	43	[Anteroventral nucleus of thalamus]	60.5585	40.4255	47.6277
Ventral medial nucleus of the thalamus	FALSE	FALSE	-26845	355	|Anterior cingulate area(incoming)|Anteromedial visual area(incoming)|Brain(incoming)|Cerebral cortex(incoming)|Cerebral cortex, layers1-6a [cortical plate](incoming)|Cerebrum(incoming)|Infralimbic area(incoming)|Midbrain-Hindbrain(incoming)|Midbrain-Hindbrain, Motor(incoming)|Midbrain-Hindbrain, Motor, Extrapyramidal(incoming)|Midbrain-Hindbrain, Sensory(incoming)|Midbrain-Hindbrain, Sensory, Vi…	31	53	[Ventral medial nucleus of the thalamus]	68.8056	51.0817	50.6
Perireunensis nucleus	FALSE	FALSE	-33733.4	33	|Brain(incoming)|Dorsal nucleus raphe(incoming)|Midbrain-Hindbrain(incoming)|Raphe of mesenchephalon(incoming)|Reticular core(incoming)	5	730	[Perireunensis nucleus]	65.5758	52.8485	53.4545
Nucleus sagulum	FALSE	FALSE	-26259.3	30	|Brain(incoming)|Midbrain-Hindbrain(incoming)|Midbrain-Hindbrain, Sensory(incoming)|Midbrain-Hindbrain, Sensory, Visual(incoming)|Superior colliculus(incoming)	5	264	[Nucleus sagulum]	95.5333	41.3	41.3667
Substantia nigra reticular part	FALSE	FALSE	-18366.5	540	|Anterior cingulate area(incoming)|Basal Nuclei(incoming)|Bed nuclei of the stria terminalis(incoming)|Bed nuclei of the stria terminalis anterior division(incoming)|Bed nuclei of the stria terminalis anterior division dorsomedial nucleus(incoming)|Bed nuclei of the stria terminalis anterior division magnocellular nucleus(incoming)|Bed nuclei of the stria terminalis anterolateral area(incoming)|B…	75	22	[Substantia nigra_ reticular part]	84.4685	55.2852	43.1667
Lateral reticular nucleus	FALSE	FALSE	-11360.9	302	|Brain(incoming)|Brainstem(incoming)|Cerebellar cortex(incoming)|Cerebellum(incoming)|Flocculus(incoming)|Hemispheric regions(incoming)|Interbrain(incoming)|Thalamus(incoming)|Ventral thalamus(incoming)|Zona incerta(incoming)|Brain(outgoing)|Cerebral cortex(outgoing)|Cerebral cortex, layers1-6a [cortical plate](outgoing)|Cerebrum(outgoing)|Hippocampal formation(outgoing)|Hippocampal region(outgoi…	16	98	[Lateral reticular nucleus]	124.583	66.5298	46.7318
Dorsomedial nucleus of the hypothalamus	FALSE	FALSE	-33752.4	194	|Ammon Horn(incoming)|Anterior hypothalamic area(incoming)|Anterior hypothalamic central part(incoming)|Anterior hypothalamic dorsal part(incoming)|Anterior hypothalamic nucleus(incoming)|Anterior hypothalamic nucleus anterior part(incoming)|Anterior hypothalamic posterior part(incoming)|Anterodorsal preoptic nucleus(incoming)|Anteroventral periventricular nucleus(incoming)|Anteroventral preoptic…	314	591	[Dorsomedial nucleus of the hypothalamus]	69.5928	60.9124	54.7113
Mediodorsal nucleus of the thalamus	FALSE	FALSE	-27577.9	430	|Agranular insular area(incoming)|Agranular insular area posterior part(incoming)|Agranular insular area ventral part(incoming)|Anterior cingulate area(incoming)|Anterior cingulate area dorsal part(incoming)|Anterior cingulate area ventral part(incoming)|Anterior hypothalamic area(incoming)|Anterior hypothalamic central part(incoming)|Anterior hypothalamic nucleus(incoming)|Anterior hypothalamic …	129	76	[Mediodorsal nucleus of thalamus]	67.9047	41.0093	52.9372
Fastigial nucleus	FALSE	FALSE	-17273	205	|Brain(incoming)|Central gray of the brain(incoming)|Midbrain-Hindbrain(incoming)|Midbrain-Hindbrain, Sensory(incoming)|Midbrain-Hindbrain, Sensory, Visual(incoming)|Periaqueductal gray(incoming)|Pontine reticular nucleus(incoming)|Pontine reticular nucleus caudal part(incoming)|Reticular core(incoming)|Reticular formation(incoming)|Superior colliculus(incoming)	11	98	[Fastigial nucleus]	118.629	37.2244	48.5756
Parabrachial nucleus	FALSE	FALSE	-15882.3	437	|Anterior hypothalamic area(incoming)|Anterior hypothalamic nucleus(incoming)|Anteroventral periventricular nucleus(incoming)|Anteroventral preoptic nucleus(incoming)|Basal Nuclei(incoming)|Bed nuclei of the stria terminalis(incoming)|Bed nuclei of the stria terminalis anterior division(incoming)|Bed nuclei of the stria terminalis anterior division dorsomedial nucleus(incoming)|Bed nuclei of the …	99	34	[Parabrachial nucleus]	104.959	41.7277	45.5927
Mesencephalic nucleus of the trigeminal	FALSE	FALSE	-17221.4	40	|Anterior cingulate area(incoming)|Anterior cingulate area dorsal part(incoming)|Basal Nuclei(incoming)|Bed nuclei of the stria terminalis(incoming)|Bed nuclei of the stria terminalis anterior division(incoming)|Bed nuclei of the stria terminalis anterolateral area(incoming)|Bed nuclei of the stria terminalis rhomboid nucleus(incoming)|Bed nuclei of the stria terminalis, anterior division, subcom…	24	355	[Midbrain trigeminal nucleus]	103.7	38.275	49.65
Dorsal motor nucleus of the vagus nerve	FALSE	TRUE	-13129.2	46	|Anterior hypothalamic area(incoming)|Basal Nuclei(incoming)|Bed nuclei of the stria terminalis(incoming)|Bed nuclei of the stria terminalis anterior division(incoming)|Bed nuclei of the stria terminalis anterolateral area(incoming)|Bed nuclei of the stria terminalis rhomboid nucleus(incoming)|Bed nuclei of the stria terminalis, anterior division, subcommisural zone(incoming)|Brain(incoming)|Brai…	38	868	[Dorsal motor nucleus of the vagus nerve]	127.283	51.1304	55.1304
Spinal nucleus of the trigeminal oral part	FALSE	FALSE	-21338.7	248	|Brain(incoming)|Midbrain-Hindbrain(incoming)|Midbrain-Hindbrain, Sensory(incoming)|Midbrain-Hindbrain, Sensory, Visual(incoming)|Superior colliculus(incoming)	5	78	[Spinal nucleus of the trigeminal_ oral part]	112.653	56.6008	40.2742
Ventral tegmental nucleus	FALSE	FALSE	-35023.7	21	|Brain(incoming)|Brainstem(incoming)|Dorsal premammillary nucleus(incoming)|Hypothalamus(incoming)|Interbrain(incoming)|Mammillary body(incoming)|Medial preoptic area(incoming)|Medial preoptic nucleus(incoming)|Medial zone of the hypothalamus(incoming)|Midbrain-Hindbrain(incoming)|Midbrain-Hindbrain, Motor(incoming)|Midbrain-Hindbrain, Motor, Extrapyramidal(incoming)|Nucleus incertus(incoming)|Nu…	32	3138	[Ventral tegmental nucleus]	100.952	46.7619	56.4762
Olfactory tubercle	FALSE	FALSE	-7349.66	1513	|Agranular insular area(incoming)|Agranular insular area posterior part(incoming)|Anterior cingulate area(incoming)|Anterior olfactory nucleus(incoming)|Basal Nuclei(incoming)|Basomedial nucleus of the amygdala(incoming)|Basomedial nucleus of the amygdala anterior part(incoming)|Basomedial nucleus of the amygdala posterior part(incoming)|Bed nuclei of the stria terminalis(incoming)|Bed nuclei of …	130	14	[Olfactory tubercle]	42.4944	67.2016	42.9894
Lateral mammillary nucleus	FALSE	FALSE	-22816.6	24	|Anterior cingulate area(incoming)|Anterior cingulate area dorsal part(incoming)|Anterior group of the dorsal thalamus(incoming)|Anterodorsal nucleus of the thalamus(incoming)|Anterodorsal preoptic nucleus(incoming)|Anteromedial nucleus of thalamus(incoming)|Anteroventral nucleus of thalamus(incoming)|Anteroventral periventricular nucleus(incoming)|Basal Nuclei(incoming)|Bed nuclei of the stria t…	80	507	[Lateral mammillary nucleus]	78.4583	63	49.7083
Taenia tecta	FALSE	FALSE	-1648.91	653	|Ammon Horn(incoming)|Basal Nuclei(incoming)|Bed nuclei of the stria terminalis(incoming)|Bed nuclei of the stria terminalis anterior division(incoming)|Bed nuclei of the stria terminalis anterior division dorsomedial nucleus(incoming)|Bed nuclei of the stria terminalis rhomboid nucleus(incoming)|Brain(incoming)|Brainstem(incoming)|Central nucleus of amygdala(incoming)|Central nucleus of amygdala…	51	77	[Taenia tecta]	33.3216	49.1531	53.144
Nucleus accumbens	FALSE	FALSE	-23554	2024	|Agranular insular area(incoming)|Agranular insular area posterior part(incoming)|Ammon Horn(incoming)|Anterior cingulate area(incoming)|Anterior cingulate area dorsal part(incoming)|Basal Nuclei(incoming)|Basomedial nucleus of the amygdala(incoming)|Basomedial nucleus of the amygdala anterior part(incoming)|Basomedial nucleus of the amygdala posterior part(incoming)|Bed nuclei of the stria termi…	141	19	[Nucleus accumbens]	41.8449	56.6309	45.754
Supargenual nucleus	FALSE	FALSE	-28014.5	11	|Brain(outgoing)|Central gray of the brain(outgoing)|Dorsal tegmental nucleus(outgoing)|Midbrain-Hindbrain(outgoing)|Reticular core(outgoing)	5	1028	[Supragenual nucleus]	109.909	48.0909	55
Nucleus raphe magnus	FALSE	FALSE	-17033.9	130	|Basal Nuclei(incoming)|Bed nuclei of the stria terminalis(incoming)|Bed nuclei of the stria terminalis anterior division(incoming)|Bed nuclei of the stria terminalis anterior division dorsomedial nucleus(incoming)|Bed nuclei of the stria terminalis anterior division magnocellular nucleus(incoming)|Brain(incoming)|Brainstem(incoming)|Central gray of the brain(incoming)|Central lateral nucleus of …	55	9791	[Nucleus raphé magnus]	106.538	62.1615	59.3538
Zona incerta	FALSE	FALSE	-21879.4	810	|Ammon Horn(incoming)|Anterior cingulate area(incoming)|Anterior group of the dorsal thalamus(incoming)|Anterior hypothalamic area(incoming)|Anterior hypothalamic central part(incoming)|Anterior hypothalamic nucleus(incoming)|Anterior hypothalamic nucleus anterior part(incoming)|Anterior hypothalamic posterior part(incoming)|Anterior pretectal nucleus(incoming)|Anterodorsal preoptic nucleus(incom…	201	14	[Zona incerta]	73.2333	52.2074	44.4506
Anteromedial nucleus of thalamus	FALSE	FALSE	-32102.9	211	|Ammon Horn(incoming)|Anterior cingulate area(incoming)|Anterior cingulate area dorsal part(incoming)|Anterior cingulate area ventral part(incoming)|Anterior hypothalamic area(incoming)|Anterior hypothalamic central part(incoming)|Anterior hypothalamic nucleus(incoming)|Basal Nuclei(incoming)|Bed nuclei of the stria terminalis(incoming)|Bed nuclei of the stria terminalis anterior division(incomin…	77	58	[Anteromedial nucleus]	61.3081	45.9716	50.782
Main olfactory bulb	FALSE	FALSE	-798.637	7884	|Ammon Horn(incoming)|Basal Nuclei(incoming)|Brain(incoming)|Brainstem(incoming)|Cerebral cortex(incoming)|Cerebral cortex, layers1-6a [cortical plate](incoming)|Cerebrum(incoming)|Field CA1(incoming)|Hippocampal formation(incoming)|Hippocampal region(incoming)|Hypothalamus(incoming)|Interbrain(incoming)|Lateral preoptic area(incoming)|Lateral zone of the hypothalamus(incoming)|Magnocellular preo…	40	41	[Main olfactory bulb]	12.3248	39.7364	47.5455
Piriform-amygdaloid area	FALSE	FALSE	-7522.91	364	|Basal Nuclei(incoming)|Basomedial nucleus of the amygdala(incoming)|Basomedial nucleus of the amygdala anterior part(incoming)|Basomedial nucleus of the amygdala posterior part(incoming)|Brain(incoming)|Brainstem(incoming)|Cerebral cortex(incoming)|Cerebral cortex, layers1-6a [cortical plate](incoming)|Cerebrum(incoming)|Cortical nucleus of the amygdala(incoming)|Cortical nucleus of the amygdala…	73	91	[Piriform-amygdalar area]	72.5495	70.7198	30.4753
Nucleus of the solitary tract	FALSE	FALSE	-12803.5	278	|Anterior hypothalamic area(incoming)|Anterior pretectal nucleus(incoming)|Anteroventral periventricular nucleus(incoming)|Basal Nuclei(incoming)|Bed nuclei of the stria terminalis(incoming)|Bed nuclei of the stria terminalis anterior division(incoming)|Bed nuclei of the stria terminalis anterior division fusiform nucleus(incoming)|Bed nuclei of the stria terminalis anterolateral area(incoming)|B…	89	93	[Nucleus of the solitary tract]	123.284	51	50.6547
Edinger-Westphal nucleus	FALSE	TRUE	-19948.1	18	|Basal Nuclei(incoming)|Bed nuclei of the stria terminalis(incoming)|Bed nuclei of the stria terminalis anterior division(incoming)|Bed nuclei of the stria terminalis anterior division dorsomedial nucleus(incoming)|Bed nuclei of the stria terminalis anterior division magnocellular nucleus(incoming)|Bed nuclei of the stria terminalis rhomboid nucleus(incoming)|Brain(incoming)|Brainstem(incoming)|C…	21	4655	[Edinger-Westphal nucleus]	87.7222	43.2222	56.9444
Ammon Horn	FALSE	FALSE	-3739.42	5825	|Anterior amygdaloid area(incoming)|Anterior cingulate area(incoming)|Anterior hypothalamic area(incoming)|Anterior hypothalamic central part(incoming)|Anterior hypothalamic nucleus(incoming)|Anterior hypothalamic posterior part(incoming)|Basal Nuclei(incoming)|Basolateral nucleus of the amygdala(incoming)|Basolateral nucleus of the amygdala anterior part(incoming)|Basolateral nucleus of the amyg…	219	3	[Ammon's Horn]	79.1942	36.1358	33.555
Paraventricular nucleus of the hypothalamus	FALSE	FALSE	-36494.7	165	|Ammon Horn(incoming)|Anterior amygdaloid area(incoming)|Anterior cingulate area(incoming)|Anterior hypothalamic area(incoming)|Anterior hypothalamic central part(incoming)|Anterior hypothalamic nucleus(incoming)|Anterior hypothalamic nucleus anterior part(incoming)|Anterior hypothalamic posterior part(incoming)|Anterodorsal preoptic nucleus(incoming)|Anteroventral periventricular nucleus(incomin…	191	446	[Paraventricular hypothalamic nucleus]	59.897	56.2424	55.6545
Magnocellular reticular nucleus	FALSE	FALSE	-11961.1	357	|Anterior pretectal nucleus(incoming)|Basal Nuclei(incoming)|Bed nuclei of the stria terminalis(incoming)|Bed nuclei of the stria terminalis anterior division(incoming)|Bed nuclei of the stria terminalis anterior division dorsomedial nucleus(incoming)|Brain(incoming)|Central gray of the brain(incoming)|Cerebrum(incoming)|Dorsal tegmental nucleus(incoming)|Midbrain-Hindbrain(incoming)|Midbrain-Hin…	25	211	[Magnocellular reticular nucleus]	112.176	66.9748	54.5182
