# Supplementary material for: Relationships between Gene Expression and Brain Wiring in the Adult Rodent Brain
Source: PLoS Comput Biol. 2011 Jan 6;7(1):e1001049. doi: 10.1371/journal.pcbi.1001049 (PMC3017102; doi:10.1371/journal.pcbi.1001049)
Supplement: Table S3 — Outgoing proximity-controlled top gene set. (0.07 MB XLS) [file pcbi.1001049.s011.xls]

## Sheet: Sheet1
Index	Gene	imageSeriesID	Gene Name	NCBI ID	URL	Thumbs URL
0	'Pgrmc1	'797	progesterone receptor membrane component 1	53328	Series summary	Thumbnails
1	'Slc25a37	'68445000	solute carrier family 25, member 37	67712	Series summary	Thumbnails
2	'Pcp2	'77413702	Purkinje cell protein 2 (L7)	18545	Series summary	Thumbnails
3	'Galr1	'80514053	galanin receptor 1	14427	Series summary	Thumbnails
4	'1700054O13Rik	'69117086	RIKEN cDNA 1700054O13 gene	67334	Series summary	Thumbnails
5	'Gm114	'70295882	gene model 114, (NCBI)	228730	Series summary	Thumbnails
6	'Alpk3	'71574473	alpha-kinase 3	116904	Series summary	Thumbnails
7	'Lrrn6c	'72128919	leucine rich repeat neuronal 6C	242384	Series summary	Thumbnails
8	'Gm47	'70565879	gene model 47, (NCBI)	195726	Series summary	Thumbnails
9	'Cpne5	'544709	copine V	240058	Series summary	Thumbnails
10	'Nmbr	'77332086	neuromedin B receptor	18101	Series summary	Thumbnails
11	'Trim52	'70205626	tripartite motif-containing 52	212085	Series summary	Thumbnails
12	'AI427122	'71495698	expressed sequence AI427122	102502	Series summary	Thumbnails
13	'Slc44a4	'68321886	solute carrier family 44, member 4	70129	Series summary	Thumbnails
14	'Nrp2	'80514091	neuropilin 2	18187	Series summary	Thumbnails
15	'Anxa3	'69526665	annexin A3	11745	Series summary	Thumbnails
16	'A930033C23Rik*	'74300717	RIKEN cDNA A930033C23 gene (non-RefSeq)	null	Series summary	Thumbnails
17	'Tac2	'77279001	tachykinin 2	21334	Series summary	Thumbnails
18	'C1qtnf9	'70228041	C1q and tumor necrosis factor related protein 9	239126	Series summary	Thumbnails
19	'Kirrel1	'71613657	kin of IRRE like 1 (Drosophila)	170643	Series summary	Thumbnails
20	'Rxfp3	'80342202	relaxin family peptide receptor 3	239336	Series summary	Thumbnails
21	'Vamp2	'1093	vesicle-associated membrane protein 2	22318	Series summary	Thumbnails
22	'Rgs9	'73521819	regulator of G-protein signaling 9	19739	Series summary	Thumbnails
23	'LOC218695	'70725001	similar to spermatogenic cell-specific gene 2	218695	Series summary	Thumbnails
24	'Ttn	'74047746	titin	22138	Series summary	Thumbnails
25	'Rasgef1b	'71358553	RasGEF domain family, member 1B	320292	Series summary	Thumbnails
26	'Ednrb	'70431307	endothelin receptor type B	13618	Series summary	Thumbnails
27	'Gpc3	'71020431	glypican 3	14734	Series summary	Thumbnails
28	'Lix1	'643	limb expression 1 homolog (chicken)	66643	Series summary	Thumbnails
29	'Tcn2	'71924389	transcobalamin 2	21452	Series summary	Thumbnails
30	'Slc25a20	'68638005	solute carrier family 25 (mitochondrial carnitine/acylcarnitine translocase), member 20	57279	Series summary	Thumbnails
31	'4930517K23Rik	'69114168	RIKEN cDNA 4930517K23 gene	403171	Series summary	Thumbnails
32	'Mybpc3	'77455149	myosin binding protein C, cardiac	17868	Series summary	Thumbnails
33	'Gpr125	'74988700	G protein-coupled receptor 125	70693	Series summary	Thumbnails
34	'Stk16	'68080710	serine/threonine kinase 16	20872	Series summary	Thumbnails
35	'Rgs3	'1822	regulator of G-protein signaling 3	50780	Series summary	Thumbnails
36	'Gng2	'77414160	guanine nucleotide binding protein (G protein), gamma 2 subunit	14702	Series summary	Thumbnails
37	'ORF9	'74580865	open reading frame 9	52793	Series summary	Thumbnails
38	'Npc1	'71234644	Niemann Pick type C1	18145	Series summary	Thumbnails
39	'4921515J06Rik	'69407821	RIKEN cDNA 4921515J06 gene	66715	Series summary	Thumbnails
40	'AU019823	'77465050	expressed sequence AU019823	270156	Series summary	Thumbnails
41	'Ptprr	'74882784	protein tyrosine phosphatase, receptor type, R	19279	Series summary	Thumbnails
42	'Gm597	'70295620	gene model 597, (NCBI)	210962	Series summary	Thumbnails
43	'Trhr	'79913245	thyrotropin releasing hormone receptor	22045	Series summary	Thumbnails
44	'Ephb1	'79677367	Eph receptor B1	270190	Series summary	Thumbnails
45	'Lcn8	'69114492	lipocalin 8	78076	Series summary	Thumbnails
46	'Pde11a	'75081007	phosphodiesterase 11A	241489	Series summary	Thumbnails
47	'Stk24	'73635773	serine/threonine kinase 24 (STE20 homolog, yeast)	223255	Series summary	Thumbnails
48	'Nedd9	'77790732	neural precursor cell expressed, developmentally down-regulated gene 9	18003	Series summary	Thumbnails
49	'A130014H13Rik	'75041574	RIKEN cDNA A130014H13 gene	319630	Series summary	Thumbnails
50	'Lrrc8d	'385997	leucine rich repeat containing 8D	231549	Series summary	Thumbnails
51	'C030019F02Rik	'1474	RIKEN cDNA C030019F02 gene	58237	Series summary	Thumbnails
52	'Dsp	'76097696	desmoplakin	109620	Series summary	Thumbnails
53	'C030014K22Rik	'72472750	RIKEN cDNA C030014K22 gene	226610	Series summary	Thumbnails
54	'A830031A19Rik	'74277746	RIKEN cDNA A830031A19 gene	268391	Series summary	Thumbnails
55	'Dio3	'70238866	deiodinase, iodothyronine type III	107585	Series summary	Thumbnails
56	'D330027H18Rik	'74822583	RIKEN cDNA D330027H18 gene	101359	Series summary	Thumbnails
57	'Zfp719	'71021028	zinc finger protein 719	210105	Series summary	Thumbnails
58	'Trhr	'1304	thyrotropin releasing hormone receptor	22045	Series summary	Thumbnails
59	'Pcdh7	'69782790	protocadherin 7	54216	Series summary	Thumbnails
60	'L1cam	'80342072	L1 cell adhesion molecule	16728	Series summary	Thumbnails
61	'Parp16	'69014872	poly (ADP-ribose) polymerase family, member 16	214424	Series summary	Thumbnails
62	'Pdlim3	'69782951	PDZ and LIM domain 3	53318	Series summary	Thumbnails
63	'mCG140156	'71211464	AB mCG140156	null	Series summary	Thumbnails
64	'Fhad1	'68546125	forkhead-associated (FHA) phosphopeptide binding domain 1	329977	Series summary	Thumbnails
65	'Svil	'77332748	supervillin	225115	Series summary	Thumbnails
66	'5730410I19Rik	'69443469	RIKEN cDNA 5730410I19 gene	66622	Series summary	Thumbnails
67	'Depdc6	'76135830	DEP domain containing 6	97998	Series summary	Thumbnails
68	'Lhx2	'79568024	LIM homeobox protein 2	16870	Series summary	Thumbnails
69	'Vav2	'68911010	Vav2 oncogene	22325	Series summary	Thumbnails
70	'5430425J12Rik	'74580781	RIKEN cDNA 5430425J12 gene	71390	Series summary	Thumbnails
71	'Ankra2	'75985901	ankyrin repeat, family A (RFXANK-like), 2	68558	Series summary	Thumbnails
72	'Stra6	'75041492	stimulated by retinoic acid gene 6	20897	Series summary	Thumbnails
73	'Htr1b	'584	5-hydroxytryptamine (serotonin) receptor 1B	15551	Series summary	Thumbnails
74	'Btg3	'168	B-cell translocation gene 3	12228	Series summary	Thumbnails
75	'Epha8	'69672090	Eph receptor A8	13842	Series summary	Thumbnails
76	'Rabgap1l	'77910828	RAB GTPase activating protein 1-like	29809	Series summary	Thumbnails
77	'Slco4c1	'69874102	solute carrier organic anion transporter family, member 4C1	227394	Series summary	Thumbnails
78	'Ccbp2	'69236987	chemokine binding protein 2	59289	Series summary	Thumbnails
79	'Olfr639	'74734764	olfactory receptor 639	259088	Series summary	Thumbnails
80	'2610019F03Rik	'74724511	RIKEN cDNA 2610019F03 gene	72148	Series summary	Thumbnails
81	'Fhl1	'2218	four and a half LIM domains 1	14199	Series summary	Thumbnails
82	'Dclre1c	'70946403	DNA cross-link repair 1C, PSO2 homolog (S. cerevisiae)	227525	Series summary	Thumbnails
83	'Chrm3	'2095	cholinergic receptor, muscarinic 3, cardiac	12671	Series summary	Thumbnails
84	'Tcte3	'69174499	t-complex-associated testis expressed 3	21647	Series summary	Thumbnails
85	'Cmtm4	'2101	CKLF-like MARVEL transmembrane domain containing 4	97487	Series summary	Thumbnails
86	'Grid2	'69257713	glutamate receptor, ionotropic, delta 2	14804	Series summary	Thumbnails
87	'Hdac5	'69734965	histone deacetylase 5	15184	Series summary	Thumbnails
88	'Cdh7	'69540683	cadherin 7, type 2	241201	Series summary	Thumbnails
89	'Grik5	'70919023	glutamate receptor, ionotropic, kainate 5 (gamma 2)	14809	Series summary	Thumbnails
90	'Ntrk1	'69782449	neurotrophic tyrosine kinase, receptor, type 1	18211	Series summary	Thumbnails
91	'Ets2	'79904406	E26 avian leukemia oncogene 2, 3' domain	23872	Series summary	Thumbnails
92	'1810007E14Rik	'68666726	RIKEN cDNA 1810007E14 gene	53906	Series summary	Thumbnails
93	'Cdan1	'69540641	congenital dyserythropoietic anemia, type I (human)	68968	Series summary	Thumbnails
94	'Thsd4	'69527776	thrombospondin, type I, domain containing 4	207596	Series summary	Thumbnails
95	'9130401M01Rik	'70717374	RIKEN cDNA 9130401M01 gene	75758	Series summary	Thumbnails
96	'Fancc	'68162253	Fanconi anemia, complementation group C	14088	Series summary	Thumbnails
97	'Gpr110	'79632204	G protein-coupled receptor 110	77596	Series summary	Thumbnails
98	'Fabp4	'74821969	fatty acid binding protein 4, adipocyte	11770	Series summary	Thumbnails
99	'BC004044	'71789051	cDNA sequence BC004044	80752	Series summary	Thumbnails
100	'Epha7	'402	Eph receptor A7	13841	Series summary	Thumbnails
101	'Gpc3	'69173280	glypican 3	14734	Series summary	Thumbnails
102	'ORF34	'74581430	open reading frame 34	207375	Series summary	Thumbnails
103	'Gramd3	'70919967	GRAM domain containing 3	107022	Series summary	Thumbnails
104	'A930017N06Rik	'77791978	RIKEN cDNA A930017N06 gene	243312	Series summary	Thumbnails
105	'Reep4	'68744761	receptor accessory protein 4	72549	Series summary	Thumbnails
106	'Unc13d	'69838393	unc-13 homolog D (C. elegans)	70450	Series summary	Thumbnails
107	'B230220E17Rik	'70611407	RIKEN cDNA B230220E17 gene	320865	Series summary	Thumbnails
108	'Tpx2	'70192015	TPX2, microtubule-associated protein homolog (Xenopus laevis)	72119	Series summary	Thumbnails
109	'Ctns	'275689	cystinosis, nephropathic	83429	Series summary	Thumbnails
110	'Chrm3	'79912556	cholinergic receptor, muscarinic 3, cardiac	12671	Series summary	Thumbnails
111	'Notch3	'1789	Notch gene homolog 3 (Drosophila)	18131	Series summary	Thumbnails
112	'A630094N22Rik*	'73906319	RIKEN cDNA A630094N22 gene (non-RefSeq)	null	Series summary	Thumbnails
113	'Nrp1	'79913171	neuropilin 1	18186	Series summary	Thumbnails
114	'A830073O21Rik	'67815960	RIKEN cDNA A830073O21 gene	320262	Series summary	Thumbnails
115	'Gnb4	'74047771	guanine nucleotide binding protein, beta 4	14696	Series summary	Thumbnails
116	'Arhgap4	'75988286	Rho GTPase activating protein 4	171207	Series summary	Thumbnails
117	'Fen1	'77620497	flap structure specific endonuclease 1	14156	Series summary	Thumbnails
118	'Rprm	'71836875	reprimo, TP53 dependent G2 arrest mediator candidate	67874	Series summary	Thumbnails
119	'9530091C08Rik	'71249747	RIKEN cDNA 9530091C08 gene	320440	Series summary	Thumbnails
120	'2310042E22Rik	'75934521	RIKEN cDNA 2310042E22 gene	66561	Series summary	Thumbnails
121	'Ttyh3	'74988711	tweety homolog 3 (Drosophila)	78339	Series summary	Thumbnails
122	'Dusp10	'75750342	dual specificity phosphatase 10	63953	Series summary	Thumbnails
123	'Gpx3	'79762714	glutathione peroxidase 3	14778	Series summary	Thumbnails
124	'Bcl11b	'74990505	B-cell leukemia/lymphoma 11B	58208	Series summary	Thumbnails
125	'Klf6	'70431247	Kruppel-like factor 6	23849	Series summary	Thumbnails
126	'Hs6st2	'72129255	heparan sulfate 6-O-sulfotransferase 2	50786	Series summary	Thumbnails
127	'Zdhhc2	'72128751	zinc finger, DHHC domain containing 2	70546	Series summary	Thumbnails
128	'Tacr1	'79591721	tachykinin receptor 1	21336	Series summary	Thumbnails
129	'Plb1	'75214962	phospholipase B1	75156	Series summary	Thumbnails
130	'Fhod3	'70565557	formin homology 2 domain containing 3	225288	Series summary	Thumbnails
131	'Cpne2	'70743844	copine II	234577	Series summary	Thumbnails
132	'Slc45a1	'69626997	solute carrier family 45, member 1	242773	Series summary	Thumbnails
133	'Cd24a	'79591541	CD24a antigen	12484	Series summary	Thumbnails
134	'Taar4	'73497217	trace amine-associated receptor 4	209513	Series summary	Thumbnails
135	'Gucy1b3	'69734845	guanylate cyclase 1, soluble, beta 3	54195	Series summary	Thumbnails
136	'Cit	'75079801	citron	12704	Series summary	Thumbnails
137	'Mesdc2	'69015464	mesoderm development candiate 2	67943	Series summary	Thumbnails
138	'Slc20a2	'70231308	solute carrier family 20, member 2	20516	Series summary	Thumbnails
139	'Nrtn	'69117402	neurturin	18188	Series summary	Thumbnails
140	'Gnao1	'506	guanine nucleotide binding protein, alpha o	14681	Series summary	Thumbnails
141	'Mtf2	'1510	metal response element binding transcription factor 2	17765	Series summary	Thumbnails
142	'Adamtsl3	'73925720	ADAMTS-like 3	269959	Series summary	Thumbnails
143	'mCG141917	'75080643	AB mCG141917	null	Series summary	Thumbnails
144	'D930046H04Rik	'70238830	RIKEN cDNA D930046H04 gene	319522	Series summary	Thumbnails
145	'Nova1	'70300565	neuro-oncological ventral antigen 1	18134	Series summary	Thumbnails
146	'4931403M11Rik	'70218456	RIKEN cDNA 4931403M11 gene	70955	Series summary	Thumbnails
147	'Crip2	'70612727	cysteine rich protein 2	68337	Series summary	Thumbnails
148	'6030405A18Rik	'71920518	RIKEN cDNA 6030405A18 gene	329641	Series summary	Thumbnails
149	'Ptf1a	'81657673	pancreas specific transcription factor, 1a	19213	Series summary	Thumbnails
150	'L1cam	'79591595	L1 cell adhesion molecule	16728	Series summary	Thumbnails
151	'S100a1	'70429411	S100 calcium binding protein A1	20193	Series summary	Thumbnails
152	'Fcho2	'68667593	FCH domain only 2	218503	Series summary	Thumbnails
153	'Fkhl18	'69288980	forkhead-like 18 (Drosophila)	14239	Series summary	Thumbnails
154	'4932442L08Rik	'70218582	RIKEN cDNA 4932442L08 gene	74432	Series summary	Thumbnails
155	'Gtf2ird1	'74510284	general transcription factor II I repeat domain-containing 1	57080	Series summary	Thumbnails
156	'mCG1049722.1	'75692992	AB mCG1049722.1	null	Series summary	Thumbnails
157	'Hs6st2	'69116691	heparan sulfate 6-O-sulfotransferase 2	50786	Series summary	Thumbnails
158	'Lbx2	'69816613	ladybird homeobox homolog 2 (Drosophila)	16815	Series summary	Thumbnails
159	'Tsga14	'68151448	testis specific gene A14	83922	Series summary	Thumbnails
160	'Ntsr1	'80342232	neurotensin receptor 1	18216	Series summary	Thumbnails
161	'Sytl5	'73930809	synaptotagmin-like 5	236643	Series summary	Thumbnails
162	'Erbb4	'72472797	v-erb-a erythroblastic leukemia viral oncogene homolog 4 (avian)	13869	Series summary	Thumbnails
163	'Glra4	'70724744	glycine receptor, alpha 4 subunit	14657	Series summary	Thumbnails
164	'Cpne8	'73520974	copine VIII	66871	Series summary	Thumbnails
165	'A230083H22Rik	'71809205	RIKEN cDNA A230083H22 gene	353211	Series summary	Thumbnails
166	'Cadps2	'73817429	Ca2+-dependent activator protein for secretion 2	320405	Series summary	Thumbnails
167	'4930557A04Rik	'73513290	RIKEN cDNA 4930557A04 gene	385317	Series summary	Thumbnails
168	'Mier2	'393264	mesoderm induction early response 1, family member 2	70427	Series summary	Thumbnails
169	'Cdc26	'392912	cell division cycle 26	66440	Series summary	Thumbnails
170	'Bcar3	'77371769	breast cancer anti-estrogen resistance 3	29815	Series summary	Thumbnails
171	'Polk	'75077171	polymerase (DNA directed), kappa	27015	Series summary	Thumbnails
172	'Snca	'79908848	synuclein, alpha	20617	Series summary	Thumbnails
173	'Mrps28	'68744612	mitochondrial ribosomal protein S28	66230	Series summary	Thumbnails
174	'C430004E15Rik	'69531007	RIKEN cDNA C430004E15 gene	97031	Series summary	Thumbnails
175	'A230067G21Rik	'74277699	RIKEN cDNA A230067G21 gene	241694	Series summary	Thumbnails
176	'Sh3kbp1	'74272906	SH3-domain kinase binding protein 1	58194	Series summary	Thumbnails
177	'Pax2	'69816667	paired box gene 2	18504	Series summary	Thumbnails
178	'BC052055	'68911016	cDNA sequence BC052055	328643	Series summary	Thumbnails
179	'1110008J03Rik	'68445694	RIKEN cDNA 1110008J03 gene	100764	Series summary	Thumbnails
180	'Hs3st1	'2305	heparan sulfate (glucosamine) 3-O-sulfotransferase 1	15476	Series summary	Thumbnails
181	'Fbxl2	'69672312	F-box and leucine-rich repeat protein 2	72179	Series summary	Thumbnails
182	'Mtl5	'75861870	metallothionein-like 5, testis-specific (tesmin)	17771	Series summary	Thumbnails
183	'Gjb6	'2261	gap junction membrane channel protein beta 6	14623	Series summary	Thumbnails
184	'Tmem64	'76098409	transmembrane protein 64	100201	Series summary	Thumbnails
185	'D3Ertd300e	'70238663	DNA segment, Chr 3, ERATO Doi 300, expressed	56790	Series summary	Thumbnails
186	'Igsf9b	'75147761	immunoglobulin superfamily, member 9B	235086	Series summary	Thumbnails
187	'Tera	'1878	teratocarcinoma expressed, serine rich	56306	Series summary	Thumbnails
188	'1700007N14Rik	'74581313	RIKEN cDNA 1700007N14 gene	74215	Series summary	Thumbnails
189	'Fbxl17	'71212440	F-box and leucine-rich repeat protein 17	50758	Series summary	Thumbnails
190	'2010107G23Rik	'81600086	RIKEN cDNA 2010107G23 gene	69894	Series summary	Thumbnails
191	'5133400G04Rik	'75931478	RIKEN cDNA 5133400G04 gene	71242	Series summary	Thumbnails
192	'Tnfsf10	'69981163	tumor necrosis factor (ligand) superfamily, member 10	22035	Series summary	Thumbnails
193	'Mum1	'69169923	melanoma associated antigen (mutated) 1	68114	Series summary	Thumbnails
194	'Runx2	'1278	runt related transcription factor 2	12393	Series summary	Thumbnails
195	'1700027I07Rik*	'73716638	RIKEN cDNA 1700027I07 gene (non-RefSeq)	null	Series summary	Thumbnails
196	'Pld3	'809	phospholipase D family, member 3	18807	Series summary	Thumbnails
197	'Sult1a1	'75774114	sulfotransferase family 1A, phenol-preferring, member 1	20887	Series summary	Thumbnails
198	'Col11a2	'74581187	procollagen, type XI, alpha 2	12815	Series summary	Thumbnails
199	'Gjb3	'75861847	gap junction membrane channel protein beta 3	14620	Series summary	Thumbnails
200	'Prkg1	'73521817	protein kinase, cGMP-dependent, type I	19091	Series summary	Thumbnails
201	'Golph3	'69013483	golgi phosphoprotein 3	66629	Series summary	Thumbnails
202	'Ccdc27	'74562552	coiled-coil domain containing 27	381580	Series summary	Thumbnails
203	'1300010F03Rik	'77799023	RIKEN cDNA 1300010F03 gene	219189	Series summary	Thumbnails
204	'Tusc3	'69134474	tumor suppressor candidate 3	80286	Series summary	Thumbnails
205	'Dnajb13	'69114115	DnaJ (Hsp40) related, subfamily B, member 13	69387	Series summary	Thumbnails
206	'Pin1	'69783196	protein (peptidyl-prolyl cis/trans isomerase) NIMA-interacting 1	23988	Series summary	Thumbnails
207	'LOC666339	'75862443	-	666339	Series summary	Thumbnails
208	'Prom1	'79756306	prominin 1	19126	Series summary	Thumbnails
209	'D930015E06Rik	'77924472	RIKEN cDNA D930015E06 gene	229473	Series summary	Thumbnails
210	'Fjx1	'1204	four jointed box 1 (Drosophila)	14221	Series summary	Thumbnails
211	'Kcnk15	'70724864	potassium channel, subfamily K, member 15	241769	Series summary	Thumbnails
212	'Treml1	'71489792	triggering receptor expressed on myeloid cells-like 1	71326	Series summary	Thumbnails
213	'Stard4	'69059820	StAR-related lipid transfer (START) domain containing 4	170459	Series summary	Thumbnails
214	'Sepp1	'79903768	selenoprotein P, plasma, 1	20363	Series summary	Thumbnails
215	'Vezt	'74819329	vezatin, adherens junctions transmembrane protein	215008	Series summary	Thumbnails
216	'F730043M19Rik*	'73731247	RIKEN cDNA F730043M19 gene (non-RefSeq)	null	Series summary	Thumbnails
217	'Man1a	'75502197	mannosidase 1, alpha	17155	Series summary	Thumbnails
218	'Eif2c3	'70724708	eukaryotic translation initiation factor 2C, 3	214150	Series summary	Thumbnails
219	'Apc	'74881517	adenomatosis polyposis coli	11789	Series summary	Thumbnails
220	'Zbtb20	'79677359	zinc finger and BTB domain containing 20	56490	Series summary	Thumbnails
221	'Ikbkb	'1750	inhibitor of kappaB kinase beta	16150	Series summary	Thumbnails
222	'Rfwd3	'67764932	ring finger and WD repeat domain 3	234736	Series summary	Thumbnails
223	'Nr2e1	'77464920	nuclear receptor subfamily 2, group E, member 1	21907	Series summary	Thumbnails
224	'Sumo1	'81600154	SMT3 suppressor of mif two 3 homolog 1 (yeast)	22218	Series summary	Thumbnails
225	'1500019G21Rik	'564782	RIKEN cDNA 1500019G21 gene	66245	Series summary	Thumbnails
226	'Galntl1	'71717305	UDP-N-acetyl-alpha-D-galactosamine:polypeptide N-acetylgalactosaminyltransferase-like 1	108760	Series summary	Thumbnails
227	'Cstf2t	'68196929	cleavage stimulation factor, 3' pre-RNA subunit 2, tau	83410	Series summary	Thumbnails
228	'Mrgprx1	'70784660	MAS-related GPR, member X1	404242	Series summary	Thumbnails
229	'Myo9b	'71456109	myosin IXb	17925	Series summary	Thumbnails
230	'Slc4a3	'69874000	solute carrier family 4 (anion exchanger), member 3	20536	Series summary	Thumbnails
231	'B3galt1	'69527896	UDP-Gal:betaGlcNAc beta 1,3-galactosyltransferase, polypeptide 1	26877	Series summary	Thumbnails
232	'Sparc	'73788443	secreted acidic cysteine rich glycoprotein	20692	Series summary	Thumbnails
233	'Pcgf6	'638729	polycomb group ring finger 6	71041	Series summary	Thumbnails
234	'Cadps2	'69540266	Ca2+-dependent activator protein for secretion 2	320405	Series summary	Thumbnails
235	'Esr2	'71670737	estrogen receptor 2 (beta)	13983	Series summary	Thumbnails
236	'Slc5a2	'68632936	solute carrier family 5 (sodium/glucose cotransporter), member 2	246787	Series summary	Thumbnails
237	'E330014M11Rik*	'74076114	RIKEN cDNA E330014M11 gene (non-RefSeq)	null	Series summary	Thumbnails
238	'St6gal2	'69290537	beta galactoside alpha 2,6 sialyltransferase 2	240119	Series summary	Thumbnails
239	'Dnahc5	'69626939	dynein, axonemal, heavy chain 5	110082	Series summary	Thumbnails
240	'Kcnn4	'119686	potassium intermediate/small conductance calcium-activated channel, subfamily N, member 4	16534	Series summary	Thumbnails
241	'Ppp2r3a	'75214935	protein phosphatase 2 (formerly 2A), regulatory subunit B, alpha	19054	Series summary	Thumbnails
242	'Sidt1	'71587812	SID1 transmembrane family, member 1	320007	Series summary	Thumbnails
243	'Zfp53	'68924709	zinc finger protein 53	24132	Series summary	Thumbnails
244	'Cxxc5	'69080510	CXXC finger 5	67393	Series summary	Thumbnails
245	'6430598A04Rik	'69549614	RIKEN cDNA 6430598A04 gene	243300	Series summary	Thumbnails
246	'Gtf2ird2	'69353548	GTF2I repeat domain containing 2	114674	Series summary	Thumbnails
247	'Vps33b	'69173250	vacuolar protein sorting 33B (yeast)	233405	Series summary	Thumbnails
248	'Glce	'71280946	glucuronyl C5-epimerase	93683	Series summary	Thumbnails
249	'Ptprz1	'71487157	protein tyrosine phosphatase, receptor type Z, polypeptide 1	19283	Series summary	Thumbnails
250	'Mesdc2	'72081556	mesoderm development candiate 2	67943	Series summary	Thumbnails
251	'Usp36	'70194648	ubiquitin specific peptidase 36	72344	Series summary	Thumbnails
252	'Elk1	'2185	ELK1, member of ETS oncogene family	13712	Series summary	Thumbnails
253	'Tspan15	'70612725	tetraspanin 15	70423	Series summary	Thumbnails
254	'Satb1	'79488931	special AT-rich sequence binding protein 1	20230	Series summary	Thumbnails
255	'Rgs11	'74562546	regulator of G-protein signaling 11	50782	Series summary	Thumbnails
256	'Kif27	'70295416	kinesin family member 27	75050	Series summary	Thumbnails
257	'Tmem23	'77910765	transmembrane protein 23	208449	Series summary	Thumbnails
258	'LOC241053	'74736087	similar to 60S ribosomal protein L12	241053	Series summary	Thumbnails
259	'Cntn1	'414	contactin 1	12805	Series summary	Thumbnails
260	'Ckm	'76115727	creatine kinase, muscle	12715	Series summary	Thumbnails
261	'4933405O20Rik	'69116859	RIKEN cDNA 4933405O20 gene	243996	Series summary	Thumbnails
262	'Obox1	'81790668	oocyte specific homeobox 1	71468	Series summary	Thumbnails
263	'AU041783	'67764927	expressed sequence AU041783	226250	Series summary	Thumbnails
264	'LOC436410	'71283376	similar to leucine-rich repeats and calponin homology (CH) domain containing 3; 2210409B11Rik	436410	Series summary	Thumbnails
265	'Vamp1	'75651233	vesicle-associated membrane protein 1	22317	Series summary	Thumbnails
266	'Grip1	'70565623	glutamate receptor interacting protein 1	74053	Series summary	Thumbnails
267	'Zbtb20	'79568020	zinc finger and BTB domain containing 20	56490	Series summary	Thumbnails
268	'Ddhd1	'69838392	DDHD domain containing 1	114874	Series summary	Thumbnails
269	'6130401L20Rik	'71892310	RIKEN cDNA 6130401L20 gene	75740	Series summary	Thumbnails
270	'2610204G22Rik	'75934922	RIKEN cDNA 2610204G22 gene	70448	Series summary	Thumbnails
271	'LOC268906	'71281919	hypothetical LOC268906	268906	Series summary	Thumbnails
272	'Hbb	'77340464	hemoglobin beta chain complex	15127	Series summary	Thumbnails
273	'Serinc5	'77278973	serine incorporator 5	218442	Series summary	Thumbnails
274	'Pim2	'32583	proviral integration site 2	18715	Series summary	Thumbnails
275	'Txnrd1	'70565383	thioredoxin reductase 1	50493	Series summary	Thumbnails
276	'Snca	'989	synuclein, alpha	20617	Series summary	Thumbnails
277	'Gad2	'79903740	glutamic acid decarboxylase 2	14417	Series summary	Thumbnails
278	'Vamp2	'1092	vesicle-associated membrane protein 2	22318	Series summary	Thumbnails
279	'Slc25a27	'74988334	solute carrier family 25, member 27	74011	Series summary	Thumbnails
280	'Foxp1	'71249056	forkhead box P1	108655	Series summary	Thumbnails
281	'TC1481850	'70812774	TIGR MGI TC1481850	null	Series summary	Thumbnails
282	'Spag5	'72081516	sperm associated antigen 5	54141	Series summary	Thumbnails
283	'Tnfaip8l3	'69447870	tumor necrosis factor, alpha-induced protein 8-like 3	244882	Series summary	Thumbnails
284	'Reln	'890	reelin	19699	Series summary	Thumbnails
285	'Cnp1	'1175	cyclic nucleotide phosphodiesterase 1	12799	Series summary	Thumbnails
286	'F930048A06Rik*	'73767424	RIKEN cDNA F930048A06 gene (non-RefSeq)	null	Series summary	Thumbnails
287	'Akr1c6	'70946159	aldo-keto reductase family 1, member C6	83702	Series summary	Thumbnails
288	'Zdhhc2	'70598366	zinc finger, DHHC domain containing 2	70546	Series summary	Thumbnails
289	'Stat2	'69133653	signal transducer and activator of transcription 2	20847	Series summary	Thumbnails
290	'Stxbp6	'70744323	syntaxin binding protein 6 (amisyn)	217517	Series summary	Thumbnails
291	'Tmem162	'71919182	transmembrane protein 162	76415	Series summary	Thumbnails
292	'Fryl	'70431430	furry homolog-like (Drosophila)	72313	Series summary	Thumbnails
293	'Mpped1	'68861785	metallophosphoesterase domain containing 1	223726	Series summary	Thumbnails
294	'Ntrk2	'746	neurotrophic tyrosine kinase, receptor, type 2	18212	Series summary	Thumbnails
295	'Tacr1	'79904248	tachykinin receptor 1	21336	Series summary	Thumbnails
296	'Il11ra2	'75041444	interleukin 11 receptor, alpha chain 2	16158	Series summary	Thumbnails
297	'Nxph1	'75084479	neurexophilin 1	18231	Series summary	Thumbnails
298	'Tyr	'2703	tyrosinase	22173	Series summary	Thumbnails
299	'Gria4	'68844654	glutamate receptor, ionotropic, AMPA4 (alpha 4)	14802	Series summary	Thumbnails
300	'G430002G23Rik	'73817932	RIKEN cDNA G430002G23 gene	114601	Series summary	Thumbnails
301	'Zfp260	'75080996	zinc finger protein 260	26466	Series summary	Thumbnails
302	'Blcap	'68637575	bladder cancer associated protein homolog (human)	53619	Series summary	Thumbnails
303	'Mrps12	'68301365	mitochondrial ribosomal protein S12	24030	Series summary	Thumbnails
304	'Iqgap1	'69262296	IQ motif containing GTPase activating protein 1	29875	Series summary	Thumbnails
305	'E2f4	'1195	E2F transcription factor 4	104394	Series summary	Thumbnails
306	'LOC433311	'74988757	LOC433311	433311	Series summary	Thumbnails
307	'Ces6	'75861873	carboxylesterase 6	102022	Series summary	Thumbnails
308	'Slc8a3	'74357546	solute carrier family 8 (sodium/calcium exchanger), member 3	110893	Series summary	Thumbnails
309	'Zfp57	'72103842	zinc finger protein 57	22715	Series summary	Thumbnails
310	'Sh3bgrl3	'69873708	SH3 domain binding glutamic acid-rich protein-like 3	73723	Series summary	Thumbnails
311	'Tcerg1l	'69980208	transcription elongation regulator 1-like	70571	Series summary	Thumbnails
312	'Cspg5	'73931385	chondroitin sulfate proteoglycan 5	29873	Series summary	Thumbnails
313	'Epb4.1l3	'72283605	erythrocyte protein band 4.1-like 3	13823	Series summary	Thumbnails
314	'AL033314	'77869128	expressed sequence AL033314	56463	Series summary	Thumbnails
315	'Cntfr	'75651138	ciliary neurotrophic factor receptor	12804	Series summary	Thumbnails
316	'Nrtn	'741	neurturin	18188	Series summary	Thumbnails
317	'Grm3	'81671346	glutamate receptor, metabotropic 3	108069	Series summary	Thumbnails
318	'Rpn2	'906	ribophorin II	20014	Series summary	Thumbnails
319	'Snapc5	'77910785	small nuclear RNA activating complex, polypeptide 5	330959	Series summary	Thumbnails
320	'Slc25a29	'78534484	solute carrier family 25 (mitochondrial carrier, palmitoylcarnitine transporter), member 29	214663	Series summary	Thumbnails
321	'Tas1r2	'74056139	taste receptor, type 1, member 2	83770	Series summary	Thumbnails
322	'E430002B13Rik*	'74300783	RIKEN cDNA E430002B13 gene (non-RefSeq)	null	Series summary	Thumbnails
323	'1700008O03Rik	'75934506	RIKEN cDNA 1700008O03 gene	69349	Series summary	Thumbnails
324	'Mfsd2	'68844397	major facilitator superfamily domain containing 2	76574	Series summary	Thumbnails
325	'Scarb2	'68546500	scavenger receptor class B, member 2	12492	Series summary	Thumbnails
326	'AI450540	'69169959	expressed sequence AI450540	226252	Series summary	Thumbnails
327	'Gas5	'483	growth arrest specific 5	14455	Series summary	Thumbnails
328	'LOC432425	'74509476	similar to nesprin 1 isoform beta; synaptic nuclei expressed gene 1; nesprin 1; enaptin	432425	Series summary	Thumbnails
329	'Ptk2	'75774672	PTK2 protein tyrosine kinase 2	14083	Series summary	Thumbnails
330	'Pou6f1	'74357559	POU domain, class 6, transcription factor 1	19009	Series summary	Thumbnails
331	'Cntfr	'71656697	ciliary neurotrophic factor receptor	12804	Series summary	Thumbnails
332	'Igfbp7	'81654139	insulin-like growth factor binding protein 7	29817	Series summary	Thumbnails
333	'LOC433727	'72076418	similar to protein tyrosine phosphatase, receptor type, D	433727	Series summary	Thumbnails
334	'Fbxo3	'69103916	F-box only protein 3	57443	Series summary	Thumbnails
335	'Nnat	'77887874	neuronatin	18111	Series summary	Thumbnails
336	'Hs6st1	'74819258	heparan sulfate 6-O-sulfotransferase 1	50785	Series summary	Thumbnails
337	'Bhlhb9	'74274689	basic helix-loop-helix domain containing, class B9	70237	Series summary	Thumbnails
338	'Uchl3	'69116402	ubiquitin carboxyl-terminal esterase L3 (ubiquitin thiolesterase)	50933	Series summary	Thumbnails
339	'Gtf2i	'2277	general transcription factor II I	14886	Series summary	Thumbnails
340	'TC1536776	'79762708	TIGR MGI TC1536776	null	Series summary	Thumbnails
341	'Kif5a	'79360322	kinesin family member 5A	16572	Series summary	Thumbnails
342	'Lrrn2	'74819328	leucine rich repeat protein 2, neuronal	16980	Series summary	Thumbnails
343	'Kcnt1	'71211407	potassium channel, subfamily T, member 1	227632	Series summary	Thumbnails
344	'Ogfod2	'69169797	2-oxoglutarate and iron-dependent oxygenase domain containing 2	66627	Series summary	Thumbnails
345	'Ptpn5	'74743293	protein tyrosine phosphatase, non-receptor type 5	19259	Series summary	Thumbnails
346	'Pacsin2	'74638864	protein kinase C and casein kinase substrate in neurons 2	23970	Series summary	Thumbnails
347	'Ctxn1	'74586669	cortexin 1	330695	Series summary	Thumbnails
348	'Utp18	'69444777	UTP18, small subunit (SSU) processome component, homolog (yeast)	217109	Series summary	Thumbnails
349	'Gabrr2	'79760466	gamma-aminobutyric acid (GABA-C) receptor, subunit rho 2	14409	Series summary	Thumbnails
350	'AI506816	'70300192	expressed sequence AI506816	433855	Series summary	Thumbnails
351	'Tusc5	'70192147	tumor suppressor candidate 5	237858	Series summary	Thumbnails
352	'Clic1	'67809267	chloride intracellular channel 1	114584	Series summary	Thumbnails
353	'Fut8	'72007749	fucosyltransferase 8	53618	Series summary	Thumbnails
354	'Slc20a2	'69262278	solute carrier family 20, member 2	20516	Series summary	Thumbnails
355	'Blcap	'71016617	bladder cancer associated protein homolog (human)	53619	Series summary	Thumbnails
356	'Sirt2	'74990520	sirtuin 2 (silent mating type information regulation 2, homolog) 2 (S. cerevisiae)	64383	Series summary	Thumbnails
357	'5930422O12Rik	'69444735	RIKEN cDNA 5930422O12 gene	319688	Series summary	Thumbnails
358	'5730455P16Rik	'69013744	RIKEN cDNA 5730455P16 gene	70591	Series summary	Thumbnails
359	'9430020K01Rik	'75988537	RIKEN cDNA 9430020K01 gene	240185	Series summary	Thumbnails
360	'Pcdhb22	'77620845	protocadherin beta 22	93893	Series summary	Thumbnails
361	'Casd1	'77620473	CAS1 domain containing 1	213819	Series summary	Thumbnails
362	'Tbc1d9b	'70542909	TBC1 domain family, member 9B	76795	Series summary	Thumbnails
363	'Cldn5	'79490120	claudin 5	12741	Series summary	Thumbnails
364	'Zbtb24	'73592542	zinc finger and BTB domain containing 24	268294	Series summary	Thumbnails
365	'Slc44a2	'79756317	solute carrier family 44, member 2	68682	Series summary	Thumbnails
366	'Sema6a	'68844851	sema domain, transmembrane domain (TM), and cytoplasmic domain, (semaphorin) 6A	20358	Series summary	Thumbnails
367	'Grik3	'75749418	glutamate receptor, ionotropic, kainate 3	14807	Series summary	Thumbnails
368	'Serinc5	'77790714	serine incorporator 5	218442	Series summary	Thumbnails
369	'Cdk4	'79677345	cyclin-dependent kinase 4	12567	Series summary	Thumbnails
370	'Sub1	'356490	SUB1 homolog (S. cerevisia	20024	Series summary	Thumbnails
371	'Nfrkb	'75831740	nuclear factor related to kappa B binding protein	235134	Series summary	Thumbnails
372	'Rpn1	'638734	ribophorin I	103963	Series summary	Thumbnails
373	'Slc2a1	'69873875	solute carrier family 2 (facilitated glucose transporter), member 1	20525	Series summary	Thumbnails
