# Supplementary material for: Relationships between Gene Expression and Brain Wiring in the Adult Rodent Brain
Source: PLoS Comput Biol. 2011 Jan 6;7(1):e1001049. doi: 10.1371/journal.pcbi.1001049 (PMC3017102; doi:10.1371/journal.pcbi.1001049)
Supplement: Table S6 — Mapping of Allen Reference Atlas Brain regions to Brain Architecture Management system regions. (0.03 MB XLS) [file pcbi.1001049.s014.xls]

## Sheet: Sheet1
label	ABA name	parentlabel	mapped BAMS (Swanson 98)
VI	Abducens nucleus	MY-mot	Abducens nucleus
AOB	Accessory olfactory bulb	OLF	Accessory olfactory bulb
CA	Ammon's Horn	HIP	Ammon Horn
AAA	Anterior amygdalar area	sAMY	Anterior amygdaloid area
ATN	Anterior group of the dorsal thalamus	DORpm	Anterior group of the dorsal thalamus
AHN	Anterior hypothalamic nucleus	MEZ	Anterior hypothalamic nucleus
AON	Anterior olfactory nucleus	OLF	Anterior olfactory nucleus
APN	Anterior pretectal nucleus	PRT	Anterior pretectal nucleus
AT	Anterior tegmental nucleus	MRNmg	Anterior tegmental nucleus
AD	Anterodorsal nucleus	ATN	Anterodorsal nucleus of the thalamus
ADP	Anterodorsal preoptic nucleus	PVR	Anterodorsal preoptic nucleus
AM	Anteromedial nucleus	ATN	Anteromedial nucleus of thalamus
AV	Anteroventral nucleus of thalamus	ATN	Anteroventral nucleus of thalamus
AVPV	Anteroventral periventricular nucleus	PVR	Anteroventral periventricular nucleus
AVP	Anteroventral preoptic nucleus	PVR	Anteroventral preoptic nucleus
ARH	Arcuate hypothalamic nucleus	PVZ	Arcuate nucleus of the hypothalamus
AP	Area postrema	MY-sen	Area postrema
B	Barrington's nucleus	P-mot	Barrington nucleus
Brain	Basic cell groups and regions		Brain
BST	Bed nuclei of the stria terminalis	PALc	Bed nuclei of the stria terminalis
BAC	Bed nucleus of the anterior commissure	PALc	Bed nucleus of the anterior commissure
BS	Brain stem	Brain	Brainstem
CP	Caudoputamen	STRd	Caudoputamen
CEA	Central amygdalar nucleus	sAMY	Central nucleus of amygdala
CL	Central lateral nucleus of the thalamus	ILM	Central lateral nucleus of the thalamus
CLI	Central linear nucleus raphé	RAmb	Central linear nucleus raphe
CM	Central medial nucleus of the thalamus	ILM	Central medial nucleus of the thalamus
CBX	Cerebellar cortex	CB	Cerebellar cortex
CBN	Cerebellar nuclei	CB	Deep cerebellar nuclei
CB	Cerebellum	Brain	Cerebellum
CTX	Cerebral cortex	CH	Cerebral cortex
CNU	Cerebral nuclei	CH	Basal Nuclei
CH	Cerebrum	Brain	Cerebrum
CN	Cochlear nuclei	MY-sen	Cochlear nuclei
COA	Cortical amygdalar area	OLF	Cortical nucleus of the amygdala
CTXpl	Cortical plate	CTX	Cerebral cortex, layers1-6a [cortical plate]
CU	Cuneate nucleus	DCN	Cuneate nucleus
CUN	Cuneiform nucleus	MBmot	Cuneiform nucleus
DG	Dentate gyrus	HIP	Dentate gyrus
DN	Dentate nucleus	CBN	Dentate nucleus
DCN	Dorsal column nuclei	MY-sen	Dorsal column nuclei
DMX	Dorsal motor nucleus of the vagus nerve	MY-mot	Dorsal motor nucleus of the vagus nerve
DR	Dorsal nucleus raphé	RAmb	Dorsal nucleus raphe
LGd	Dorsal part of the lateral geniculate complex	GENd	Dorsal part of the lateral geniculate complex
PMd	Dorsal premammillary nucleus	MEZ	Dorsal premammillary nucleus
DTN	Dorsal tegmental nucleus	P-mot	Dorsal tegmental nucleus
DMH	Dorsomedial nucleus of the hypothalamus	PVR	Dorsomedial nucleus of the hypothalamus
EW	Edinger-Westphal nucleus	MBmot	Edinger-Westphal nucleus
EPI	Epithalamus	DORpm	Epithalamus
ECU	External cuneate nucleus	MY-sen	External cuneate nucleus
VII	Facial motor nucleus	MY-mot	Facial nucleus
FN	Fastigial nucleus	CBN	Fastigial nucleus
CA1sp	Field CA1 pyramidal layer	CA	Field CA1 pyramidal layer
CA3sp	Field CA3 pyramidal layer	CA	Field CA3 pyramidal layer
FS	Fundus of striatum	STRv	Fundus of the striatum
GENd	Geniculate group_ dorsal thalamus	DORsm	Geniculate group of the dorsal thalamus
GENv	Geniculate group_ ventral thalamus	DORpm	Geniculate group of the ventral thalamus
GR	Gracile nucleus	DCN	Gracile nucleus
HB	Hindbrain	BS
HPF	Hippocampal formation	CTXpl	Hippocampal formation
HIP	Hippocampal region	HPF	Hippocampal region
XII	Hypoglossal nucleus	MY-mot	Hypoglossal nucleus
LZ	Hypothalamic lateral zone	HY	Lateral hypothalamic area
MEZ	Hypothalamic medial zone	HY	Medial zone of the hypothalamus
HY	Hypothalamus	IB	Hypothalamus
IC	Inferior colliculus	MBsen	Inferior colliculus
IO	Inferior olivary complex	MY-mot	Inferior olivary complex
ISN	Inferior salivatory nucleus	MY-mot	Inferior salivatory nucleus
IAD	Interanterodorsal nucleus of the thalamus	ATN	Interanterodorsal nucleus of the thalamus
IAM	Interanteromedial nucleus of the thalamus	ATN	Interanteromedial nucleus of the thalamus
IB	Interbrain	BS	Interbrain
IGL	Intergeniculate leaflet of the lateral geniculate complex	GENv	Intergeniculate leaflet of the lateral geniculate complex
IMD	Intermediodorsal nucleus of the thalamus	MED	Intermediodorsal nucleus of the thalamus
IPN	Interpeduncular nucleus	RAmb	Interpeduncular nucleus
IP	Interposed nucleus	CBN	Interposed nucleus
INC	Interstitial nucleus of Cajal	PAG	Interstitial nucleus of Cajal
ILM	Intralaminar nuclei of the dorsal thalamus	DORpm	Intralaminar nuclei of the dorsal thalamus
LD	Lateral dorsal nucleus of thalamus	ATN	Lateral dorsal nucleus of thalamus
LAT	Lateral group of the dorsal thalamus	DORpm	Lateral group of the dorsal thalamus
LH	Lateral habenula	EPI	Lateral habenula
LM	Lateral mammillary nucleus	MBO	Lateral mammillary nucleus
LP	Lateral posterior nucleus of the thalamus	LAT	Lateral posterior nucleus of the thalamus
LRN	Lateral reticular nucleus	MY-mot	Lateral reticular nucleus
LSX	Lateral septal complex	STR	Lateral septal complex
LS	Lateral septal nucleus	LSX	Lateral septal nucleus
LAV	Lateral vestibular nucleus	VNC	Lateral vestibular nucleus
LIN	Linear nucleus of the medulla	MY-mot	Linear nucleus of the medulla
LC	Locus ceruleus	P-sat	Locus coeruleus
MA	Magnocellular nucleus	PALv	Magnocellular preoptic nucleus
MARN	Magnocellular reticular nucleus	MY-mot	Magnocellular reticular nucleus
MOB	Main olfactory bulb	OLF	Main olfactory bulb
MBO	Mammillary body	MEZ	Mammillary body
MEA	Medial amygdalar nucleus	sAMY	Medial nucleus of the amygdala
MG	Medial geniculate complex	GENd	Medial geniculate complex
MED	Medial group of the dorsal thalamus	DORpm	Medial group of the dorsal thalamus
MH	Medial habenula	EPI	Medial habenula
MM	Medial mammillary nucleus	MBO	Medial mammillary nucleus
MPN	Medial preoptic nucleus	MEZ	Medial preoptic nucleus
MPT	Medial pretectal area	PRT	Medial pretectal area
MV	Medial vestibular nucleus	VNC	Medial vestibular nucleus
MEPO	Median preoptic nucleus	PVR	Median preoptic nucleus
MD	Mediodorsal nucleus of thalamus	MED	Mediodorsal nucleus of the thalamus
MY	Medulla	HB
MY-sat	Medulla_ behavioral state related	MY
MY-mot	Medulla_ motor related	MY
MY-sen	Medulla_ sensory related	MY
MB	Midbrain	BS
RAmb	Midbrain raphé nuclei	MBsta	Dorsal nucleus raphe
RAmb	Midbrain raphé nuclei	MBsta	Interfascicular nucleus raphe
RAmb	Midbrain raphé nuclei	MBsta	Rostral linear nucleus raphe
RAmb	Midbrain raphé nuclei	MBsta	Central linear nucleus raphe
RAmb	Midbrain raphé nuclei	MBsta	Superior central nucleus raphe
MRNmg	Midbrain reticular nucleus_ magnocellular part_ general	MBmot
RR	Midbrain reticular nucleus_ retrorubral area	MBmot	Retrorubral area
MEV	Midbrain trigeminal nucleus	MBsen	Mesencephalic nucleus of the trigeminal
MBsta	Midbrain_ behavioral state related	MB
MBmot	Midbrain_ motor related	MB	Midbrain-Hindbrain, Motor
MBsen	Midbrain_ sensory related	MB	Midbrain-Hindbrain, Sensory
V	Motor nucleus of trigeminal	P-mot	Motor nucleus of the trigeminal
ACB	Nucleus accumbens	STRv	Nucleus accumbens
AMB	Nucleus ambiguus	MY-mot	Nucleus ambiguus, ventral division
AMB	Nucleus ambiguus	MY-mot	Nucleus ambiguus dorsal division
NI	Nucleus incertus	P-sat	Nucleus incertus
NB	Nucleus of the brachium of the inferior colliculus	MBsen	Nucleus of the brachium of the inferior colliculus
NLL	Nucleus of the lateral lemniscus	P-sen	Nucleus of the lateral lemniscus
NLOT	Nucleus of the lateral olfactory tract	OLF	Nucleus of the lateral olfactory tract
NOT	Nucleus of the optic tract	PRT	Nucleus of the optic tract
NPC	Nucleus of the posterior commissure	PRT	Nucleus of the posterior commissure
NTS	Nucleus of the solitary tract	MY-sen	Nucleus of the solitary tract
RM	Nucleus raphé magnus	MY-sat	Nucleus raphe magnus
RO	Nucleus raphé obscurus	MY-sat	Nucleus raphe obscurus
RPO	Nucleus raphé pontis	P-sat	Nucleus raphe pontis
SAG	Nucleus sagulum	MBsen	Nucleus sagulum
x	Nucleus x	MY-mot	Nucleus x
y	Nucleus y	MY-mot	Nucleus y
III	Oculomotor nucleus	MBmot	Oculomotor nucleus
OLF	Olfactory areas	CTXpl	Olfactory areas
OT	Olfactory tubercle	STRv	Olfactory tubercle
OP	Olivary pretectal nucleus	PRT	Olivary pretectal nucleus
PAL	Pallidum	CNU	Pallidum
PALc	Pallidum_ caudal region	PAL	Bed nucleus of the anterior commissure
PALc	Pallidum_ caudal region	PAL	Bed nuclei of the stria terminalis
PALd	Pallidum_ dorsal region	PAL	Pallidum dorsal region
PALm	Pallidum_ medial region	PAL	Triangular nucleus of the septum
PALm	Pallidum_ medial region	PAL	Medial septal complex
PALv	Pallidum_ ventral region	PAL	Magnocellular preoptic nucleus
PALv	Pallidum_ ventral region	PAL	Substantia innominata
PBG	Parabigeminal nucleus	MBsen	Parageminal nucleus
PB	Parabrachial nucleus	P-sen	Parabrachial nucleus
PCN	Paracentral nucleus	ILM	Paracentral nucleus of the thalamus
PF	Parafascicular nucleus	ILM	Parafascicular nucleus
PGRN	Paragigantocellular reticular nucleus	MY-mot	Paragigantocellular reticular nucleus
PPY	Parapyramidal nucleus	MY-mot	Parapyramidal nucleus
PAS	Parasolitary nucleus	MY-mot	Parasolitary nucleus
PS	Parastrial nucleus	PVR	Parastrial nucleus
PVH	Paraventricular hypothalamic nucleus	PVZ	Paraventricular nucleus of the hypothalamus
PPN	Pedunculopontine nucleus	MBsta	Pedunculopontine nucleus
PAG	Periaqueductal gray	MBmot	Periaqueductal gray
PP	Peripeduncular nucleus	DORsm	Peripeduncular nucleus
PR	Perireunensis nucleus	MED	Perireunensis nucleus
PVR	Periventricular region	HY
PVZ	Periventricular zone	HY	Periventricular zone of the hypothalamus
PIR	Piriform area	OLF	Piriform area
PAA	Piriform-amygdalar area	OLF	Piriform-amygdaloid area
P	Pons	HB
P-sat	Pons_ behavioral state related	P
P-mot	Pons_ motor related	P
P-sen	Pons_ sensory related	P
PCG	Pontine central gray	P-mot	Pontine central gray
PG	Pontine gray	P-mot	Pontine gray
PH	Posterior hypothalamic nucleus	MEZ	Posterior hypothalamic nucleus
PD	Posterodorsal preoptic nucleus	PVR	Posterodorsal preoptic nucleus
TR	Postpiriform transition area	OLF	Postpiriform transition area
PRT	Pretectal region	MBmot	Pretectal region
PSV	Principal sensory nucleus of the trigeminal	P-sen	Principal sensory nucleus of the trigeminal
RN	Red Nucleus	MBmot	Red nucleus
RT	Reticular nucleus of the thalamus	DORpm	Reticular nucleus of the thalamus
RHP	Retrohippocampal region	HPF	Retrohippocampal region
SF	Septofimbrial nucleus	LSX	Septofimbrial nucleus
SPVC	Spinal nucleus of the trigeminal_ caudal part	MY-sen	Spinal nucleus of the trigeminal caudal part
SPVI	Spinal nucleus of the trigeminal_ interpolar part	MY-sen	Spinal nucleus of the trigeminal interpolar part
SPVO	Spinal nucleus of the trigeminal_ oral part	MY-sen	Spinal nucleus of the trigeminal oral part
STR	Striatum	CNU	Striatum
STRd	Striatum dorsal region	STR	Striatum dorsal region
STRv	Striatum ventral region	STR	Striatum ventral region
sAMY	Striatum-like amygdalar nuclei	STR	Striatum caudal (amygdalar) region
SLC	Subceruleus nucleus	P-sat	Subcoeruleus nucleus
SUB	Subiculum	RHP	Subiculum
SLD	Sublaterodorsal nucleus	P-sat	Sublaterodorsal nucleus
SI	Substantia innominata	PALv	Substantia innominata
SNc	Substantia nigra_ compact part	MBsta	Substantia nigra compact part
SNr	Substantia nigra_ reticular part	MBmot	Substantia nigra reticular part
STN	Subthalamic nucleus	LZ	Subthalamic nucleus
CS	Superior central nucleus raphé	P-sat	Superior central nucleus raphe
SCm	Superior colliculus_ motor related	MBmot	Superior colliculus intermediate deep gray layer
SCm	Superior colliculus_ motor related	MBmot	Superior colliculus intermediate gray layer
SCm	Superior colliculus_ motor related	MBmot	Superior colliculus intermediate white layer
SCm	Superior colliculus_ motor related	MBmot	Superior colliculus intermediate deep white layer
SCs	Superior colliculus_ sensory related	MBsen	Superior colliculus zonal layer
SCs	Superior colliculus_ sensory related	MBsen	Superior colliculus optic layer
SCs	Superior colliculus_ sensory related	MBsen	Superior colliculus superficial gray layer
SOC	Superior olivary complex	P-sen	Superior olivary complex
SCH	Suprachiasmatic nucleus	PVR	Suprachiasmatic nucleus
SGN	Suprageniculate nucleus	LAT	Suprageniculate nucleus
SG	Supragenual nucleus	P-mot	Supargenual nucleus
SUM	Supramammillary nucleus	MBO	Supramammillary nucleus
SUT	Supratrigeminal nucleus	P-mot	Supratrigeminal nucleus
TT	Taenia tecta	OLF	Taenia tecta
TRN	Tegmental reticular nucleus	P-mot	Tegmental reticular nucleus
TH	Thalamus	IB	Thalamus
DORpm	Thalamus_ polymodal association cortex related	TH	Anterior group of the dorsal thalamus
DORpm	Thalamus_ polymodal association cortex related	TH	Epithalamus
DORpm	Thalamus_ polymodal association cortex related	TH	Geniculate group of the ventral thalamus
DORpm	Thalamus_ polymodal association cortex related	TH	Intralaminar nuclei of the dorsal thalamus
DORpm	Thalamus_ polymodal association cortex related	TH	Lateral group of the dorsal thalamus
DORpm	Thalamus_ polymodal association cortex related	TH	Medial group of the dorsal thalamus
DORpm	Thalamus_ polymodal association cortex related	TH	Midline group of the dorsal thalamus
DORpm	Thalamus_ polymodal association cortex related	TH	Reticular nucleus of the thalamus
DORsm	Thalamus_ sensory-motor cortex related	TH	Geniculate group of the dorsal thalamus
DORsm	Thalamus_ sensory-motor cortex related	TH	Peripeduncular nucleus
DORsm	Thalamus_ sensory-motor cortex related	TH
DORsm	Thalamus_ sensory-motor cortex related	TH	Subparafascicular nucleus
DORsm	Thalamus_ sensory-motor cortex related	TH	Ventral group of the dorsal thalamus
IV	Trochlear nucleus	MBmot	Trochlear nucleus
TU	Tuberal nucleus	LZ	Tuberal nucleus
VENT	Ventral group of the dorsal thalamus	DORsm	Ventral group of the dorsal thalamus
VM	Ventral medial nucleus of the thalamus	VENT	Ventral medial nucleus of the thalamus
LGv	Ventral part of the lateral geniculate complex	GENv	Ventral part of the lateral geniculate complex
VP	Ventral posterior complex of the thalamus	VENT	Ventral posterior complex of the thalamus
PMv	Ventral premammillary nucleus	MEZ	Ventral premammillary nucleus
VTA	Ventral tegmental area	MBmot	Ventral tegmental area
VTN	Ventral tegmental nucleus	MRNmg	Ventral tegmental nucleus
VMH	Ventromedial hypothalamic nucleus	MEZ	Ventromedial nucleus of the hypothalamus
VNC	Vestibular nuclei	MY-mot	Vestibular nuclei
ZI	Zona incerta	LZ	Zona incerta
